# Supplementary material for: Electric-Field Engineering and SISSO Prediction of Schottky Barrier Heights
Source: Research Square preprint supplement (doi:10.21203/rs.3.rs-7880299/v1), 2025-11-20
Supplement: Supplementary file 1 [file 2a3965b9307911f5babd7d5e.docx]

**Supplemental Material**

**Electric-Field Engineering and SISSO Prediction of Schottky Barrier Heights**

Qian Chen1, Chenghua Sun2, Xinjie Wang1, Lixuan Wang1, Guoqiang Hao1*****, Jisong Hu3,5*****, Rui Zhang4*****, Qingguo Xu6*****

1 *School of Materials Science and Engineering, East China University of Science and Technology, Shanghai 200237, China.*

2*Department of Chemistry and Biotechnology, Swinburne University of Technology, Victoria 3122, Australia*

3 *School of Materials Science and Engineering, Hanshan Normal University, Chaozhou, Guangdong, 521041, China.*

4 *Faculty of Chemical Engineering and Energy Technology, Shanghai Institute of Technology, Shanghai, 201418, PR China.*

5 *Shenzhen Key Laboratory of Polymer Science and Technology, College of Materials Science and Engineering, Shenzhen University, Shenzhen, 518060, China.*

6 *Shanghai Solar Energy Research Center Co., Ltd, 201100, China.*

**Table S1** The Work Function (WF) of monolayer graphene and each monolayer MX2.

| **Structure (Monolayer)** | **WF (eV)** |
| --- | --- |
| C | 4.258 |
| CrSe2 | 4.723 |
| MoS2 | 4.664 |
| MoSe2 | 4.473 |
| WS2 | 4.380 |
| WSe2 | 4.461 |

**Table S2** The variation of contact types of different heterostructures with the applied electric field.

| **Structure** | **Electric field range (V/Å)** | **Type of contact** |
| --- | --- | --- |
| C-CrSe2 | -0.5 ≤ E ≤ -0.4 | Ohmic contact |
| E = -0.3 | p-type Quasi-Ohmic contact |
| E = -0.2 | p-type Schottky contact |
| E = -0.1 | n-type Schottky contact |
| E = 0.0 | n-type Quasi-Ohmic contact |
| 0.1 ≤ E ≤ 0.5 | Ohmic contact |
| C-MoS2 | E = -0.5 | Ohmic contact |
| E = -0.4 | p-type Quasi-Ohmic contact |
| -0.3 ≤ E ≤ -0.2 | p-type Schottky contact |
| E = -0.1 | n-type Schottky contact |
| E = 0.0 | n-type Quasi-Ohmic contact |
| 0.1 ≤ E ≤ 0.5 | Ohmic contact |
| C-MoSe2 | E = -0.5 | Ohmic contact |
| E = -0.4 | p-type Quasi-Ohmic contact |
| -0.3 ≤ E ≤ -0.1 | p-type Schottky contact |
| 0.0 ≤ E ≤ 0.3 | n-type Schottky contact |
| E = 0.4 | n-type Quasi-Ohmic contact |
| E = 0.5 | Ohmic contact |
| C-WS2 | E = -0.5 | Ohmic contact |
| E = -0.4 | p-type Quasi-Ohmic contact |
| -0.3 ≤ E ≤ -0.2 | p-type Schottky contact |
| -0.1 ≤ E ≤ 0.0 | n-type Schottky contact |
| E = 0.1 | n-type Quasi-Ohmic contact |
| 0.2 ≤ E ≤ 0.5 | Ohmic contact |
| C-WSe2 | -0.5 ≤ E ≤ -0.4 | Ohmic contact |
| E = -0.3 | p-type Quasi-Ohmic contact |
| -0.2 ≤ E ≤ 0.0 | p-type Schottky contact |
| 0.1 ≤ E ≤ 0.3 | n-type Schottky contact |
| E = 0.4 | n-type Quasi-Ohmic contact |
| E = 0.5 | Ohmic contact |

**Table S3** Subdivided electric field regulation range of each C-MX2.

| **Structure** | **Electric field regulation range (V/Å)** |
| --- | --- |
| C-CrSe2 | -0.3, -0.27, -0.24, -0.21, -0.2, -0.18, -0.15, -0.12, -0.1, -0.09, -0.06, -0.03, 0.0 |
| C-MoS2 | -0.4, -0.36, -0.32, -0.3, -0.28, -0.24, -0.2, -0.16, -0.12, -0.1, -0.08, -0.04, 0.0 |
| C-MoSe2 | -0.4, -0.33, -0.3, -0.26, -0.2, -0.19, -0.12, -0.1, -0.05, 0.0, 0.02, 0.09, 0.1, 0.16, 0.2, 0.23, 0.3, 0.4 |
| C-WS2 | -0.4, -0.355, -0.31, -0.3, -0.265, -0.22, -0.2, -0.175, -0.13, -0.1, -0.085, -0.04, 0.0, 0.005, 0.05, 0.1 |
| C-WSe2 | -0.3, -0.23, -0.2, -0.16, -0.1, -0.09, -0.02, 0.0, 0.05, 0.1, 0.12, 0.19, 0.26, 0.33, 0.4 |

**Note:** The subdivided electric field intervals use the quasi-Ohmic contact point as the boundary, with a step size equal to one-tenth of the interval length. If the interval contains data in the range of −0.5 to 0.5 eV, it is also inserted accordingly.

**Table S4** The *E*g, ΔQC, and PTB of five C-MX₂ heterostructures as a function of the applied electric field.

| **Structure** | ***E* (V/Å)** | ***E*g (eV)** | **ΔQC (e)** | **PTB** |
| --- | --- | --- | --- | --- |
| C-CrSe2 | -0.3 | 0.687582 | -0.254213355 | 0.020057671 |
| -0.27 | 0.687928 | -0.241103696 | 0.020026079 |
| -0.24 | 0.6874 | -0.227350778 | 0.020021748 |
| -0.21 | 0.686452 | -0.214520112 | 0.019978235 |
| -0.2 | 0.68612 | -0.209412694 | 0.01994318 |
| -0.18 | 0.685375 | -0.200830881 | 0.019938495 |
| -0.15 | 0.68459 | -0.187654922 | 0.01989391 |
| -0.12 | 0.683789 | -0.174185849 | 0.019891106 |
| -0.1 | 0.683507 | -0.165546626 | 0.019849687 |
| -0.09 | 0.682656 | -0.160903532 | 0.019840826 |
| -0.06 | 0.682234 | -0.147698327 | 0.019798385 |
| -0.03 | 0.681038 | -0.13516556 | 0.01979342 |
| 0 | 0.680925 | -0.12142183 | 0.019757195 |
| C-MoS2 | -0.4 | 1.117344 | -0.285177428 | 0.021103978 |
| -0.36 | 1.120595 | -0.268256843 | 0.021077293 |
| -0.32 | 1.123196 | -0.250804705 | 0.021054118 |
| -0.3 | 1.123582 | -0.2421456 | 0.021047659 |
| -0.28 | 1.124594 | -0.233320676 | 0.021000803 |
| -0.24 | 1.125748 | -0.215656447 | 0.020972608 |
| -0.2 | 1.12606 | -0.197764853 | 0.02097063 |
| -0.16 | 1.12552 | -0.180501779 | 0.02090317 |
| -0.12 | 1.124776 | -0.163012422 | 0.020861399 |
| -0.1 | 1.123336 | -0.154045878 | 0.020840003 |
| -0.08 | 1.122826 | -0.145267865 | 0.020837172 |
| -0.04 | 1.120067 | -0.127940548 | 0.02077929 |
| 0 | 1.117475 | -0.110513334 | 0.020736072 |
| C-MoSe2 | -0.4 | 1.537885 | -0.098389924 | 0.023513854 |
| -0.33 | 1.536133 | -0.089025998 | 0.022705359 |
| -0.3 | 1.535383 | -0.085084337 | 0.0223669 |
| -0.26 | 1.534657 | -0.079831489 | 0.021921903 |
| -0.2 | 1.533647 | -0.071841639 | 0.021263248 |
| -0.19 | 1.533393 | -0.070540414 | 0.021156868 |
| -0.12 | 1.532918 | -0.061396086 | 0.020408387 |
| -0.1 | 1.53274 | -0.058799021 | 0.020203863 |
| -0.05 | 1.532216 | -0.052230727 | 0.019672822 |
| 0 | 1.531875 | -0.045700443 | 0.019166571 |
| 0.02 | 1.531868 | -0.043137663 | 0.018984032 |
| 0.09 | 1.532128 | -0.034023417 | 0.018311724 |
| 0.1 | 1.531999 | -0.032699929 | 0.018206023 |
| 0.16 | 1.532036 | -0.024859777 | 0.017646461 |
| 0.2 | 1.532731 | -0.019658139 | 0.017274713 |
| 0.23 | 1.533105 | -0.015736625 | 0.017008376 |
| 0.3 | 1.534085 | -0.00651692 | 0.01639276 |
| 0.4 | 1.535845 | 0.006824183 | 0.015563722 |
| C-WS2 | -0.4 | 1.282713 | -0.206635139 | 0.023707634 |
| -0.355 | 1.284987 | -0.186480991 | 0.0236342 |
| -0.31 | 1.286668 | -0.167011784 | 0.023596961 |
| -0.3 | 1.287607 | -0.162975802 | 0.023566977 |
| -0.265 | 1.28745 | -0.14748539 | 0.023523566 |
| -0.22 | 1.287798 | -0.127932116 | 0.023473242 |
| -0.2 | 1.287619 | -0.119057808 | 0.02343387 |
| -0.175 | 1.287408 | -0.108492288 | 0.023392582 |
| -0.13 | 1.286348 | -0.089767774 | 0.023323167 |
| -0.1 | 1.285111 | -0.077516464 | 0.02326568 |
| -0.085 | 1.284254 | -0.071238957 | 0.023223125 |
| -0.04 | 1.282074 | -0.054299896 | 0.023088033 |
| 0 | 1.280035 | -0.043675382 | 0.022801195 |
| 0.005 | 1.279872 | -0.042857747 | 0.022772985 |
| 0.05 | 1.278394 | -0.037194729 | 0.022263975 |
| 0.1 | 1.275349 | -0.031074371 | 0.021688589 |
| C-WSe2 | -0.3 | 1.627892 | -0.081586701 | 0.022460662 |
| -0.23 | 1.634408 | -0.072626883 | 0.021662061 |
| -0.2 | 1.635755 | -0.068780088 | 0.021322529 |
| -0.16 | 1.6392 | -0.063712165 | 0.020909751 |
| -0.1 | 1.639761 | -0.056011569 | 0.020248349 |
| -0.09 | 1.64 | -0.054765233 | 0.020160983 |
| -0.02 | 1.6364 | -0.045862114 | 0.019430853 |
| 0 | 1.641003 | -0.043295269 | 0.019227769 |
| 0.05 | 1.6405 | -0.036954457 | 0.018717463 |
| 0.1 | 1.63976 | -0.030594137 | 0.0182583 |
| 0.12 | 1.6394 | -0.027991486 | 0.018065409 |
| 0.19 | 1.6367 | -0.019047692 | 0.017397935 |
| 0.2 | 1.636397 | -0.017744849 | 0.017312974 |
| 0.26 | 1.633 | -0.010022609 | 0.016752286 |
| 0.3 | 1.630397 | -0.004850227 | 0.016410518 |
| 0.33 | 1.6283 | -0.000805744 | 0.016147945 |
| 0.4 | 1.62364 | 0.019488785 | 0.0158216 |

**Table S5** The constituent elements of the studied MX2 and the basic physical properties of their corresponding elemental substances.

| **Element or its corresponding simple substance**  **Features** | **M (Cr, Mo, W)** | **X (S, Se)** | **C** |
| --- | --- | --- | --- |
| Relative atomic mass | *M*1 | *M*2 | *M*3 |
| Atomic radius | *R*m1 | *R*m2 | *R*m3 |
| Subvalence electrons | *q*(n-1)d1 | *q*(n-1)p2 | *q*(n-1)p3 |
| Outermost electrons | *q*ns1 | *q*ns2 | *q*ns3 |
| Valence electrons | *Ne*1 | *Ne*2 | *Ne*3 |
| Pauling electronegativity | *χ*1 | *χ*2 | *χ*3 |
| Electron affinity | *E*A1 | *E*A2 | *E*A3 |
| First ionization energy | *E*i1 | *E*i2 | *E*i3 |
| Melting point | *T*m1 | *T*m2 | / |
| Density | *ρ*1(g/cm3) | *ρ*2(g/cm3) | *ρ*3(g/cm3) |
| Boiling point | *bp*1(K) | *bp*2(K) | *bp*3(K) |
| Thermal conductivity | *λ*1(W/mK) | *λ*2(W/mK) | *λ*3(W/mK) |
| Electrical resistivity | *ρ*1(nΩ∙m) | */* | *ρ*3(nΩ∙m) |
| Heat capacity | *c*1(J/gK) | *c*2(J/gK) | */* |

**Note:** Basic physical properties of the constituent elements in the studied heterostructures (Feature1, Feature2, Feature3).


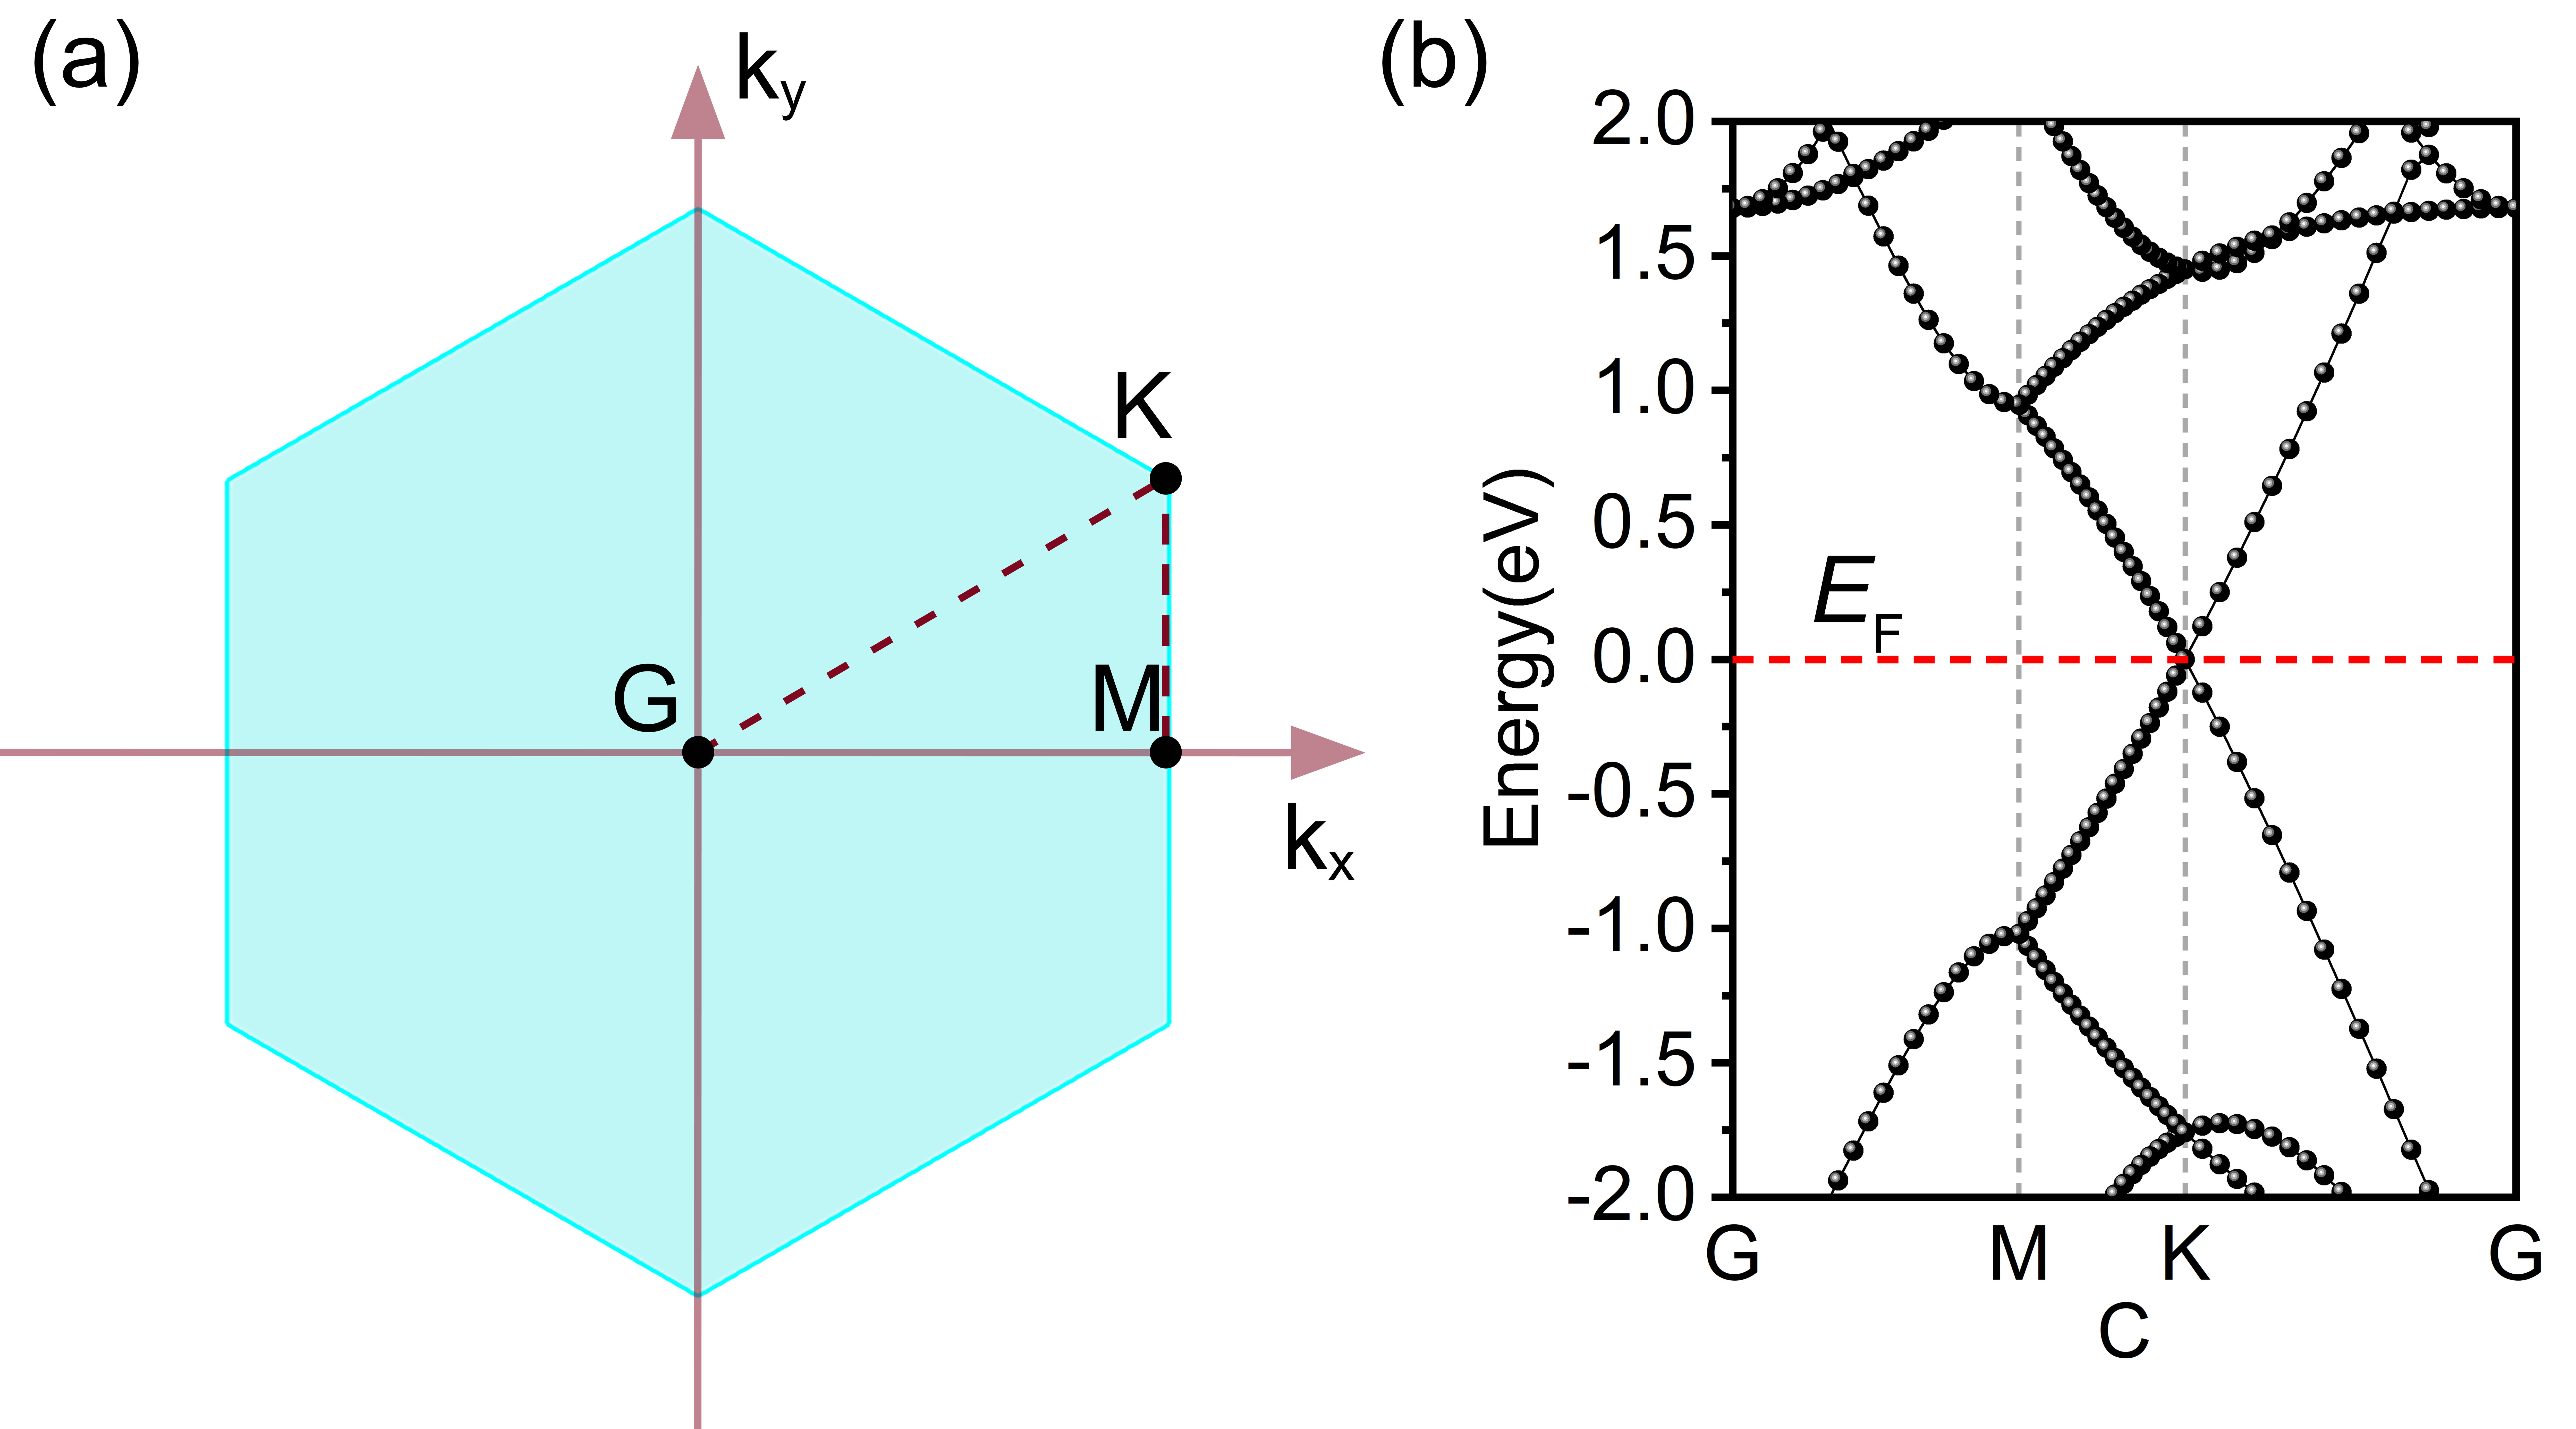


**Figure S1** (a) High-symmetry path in k-space. (b) Graphene band structure.


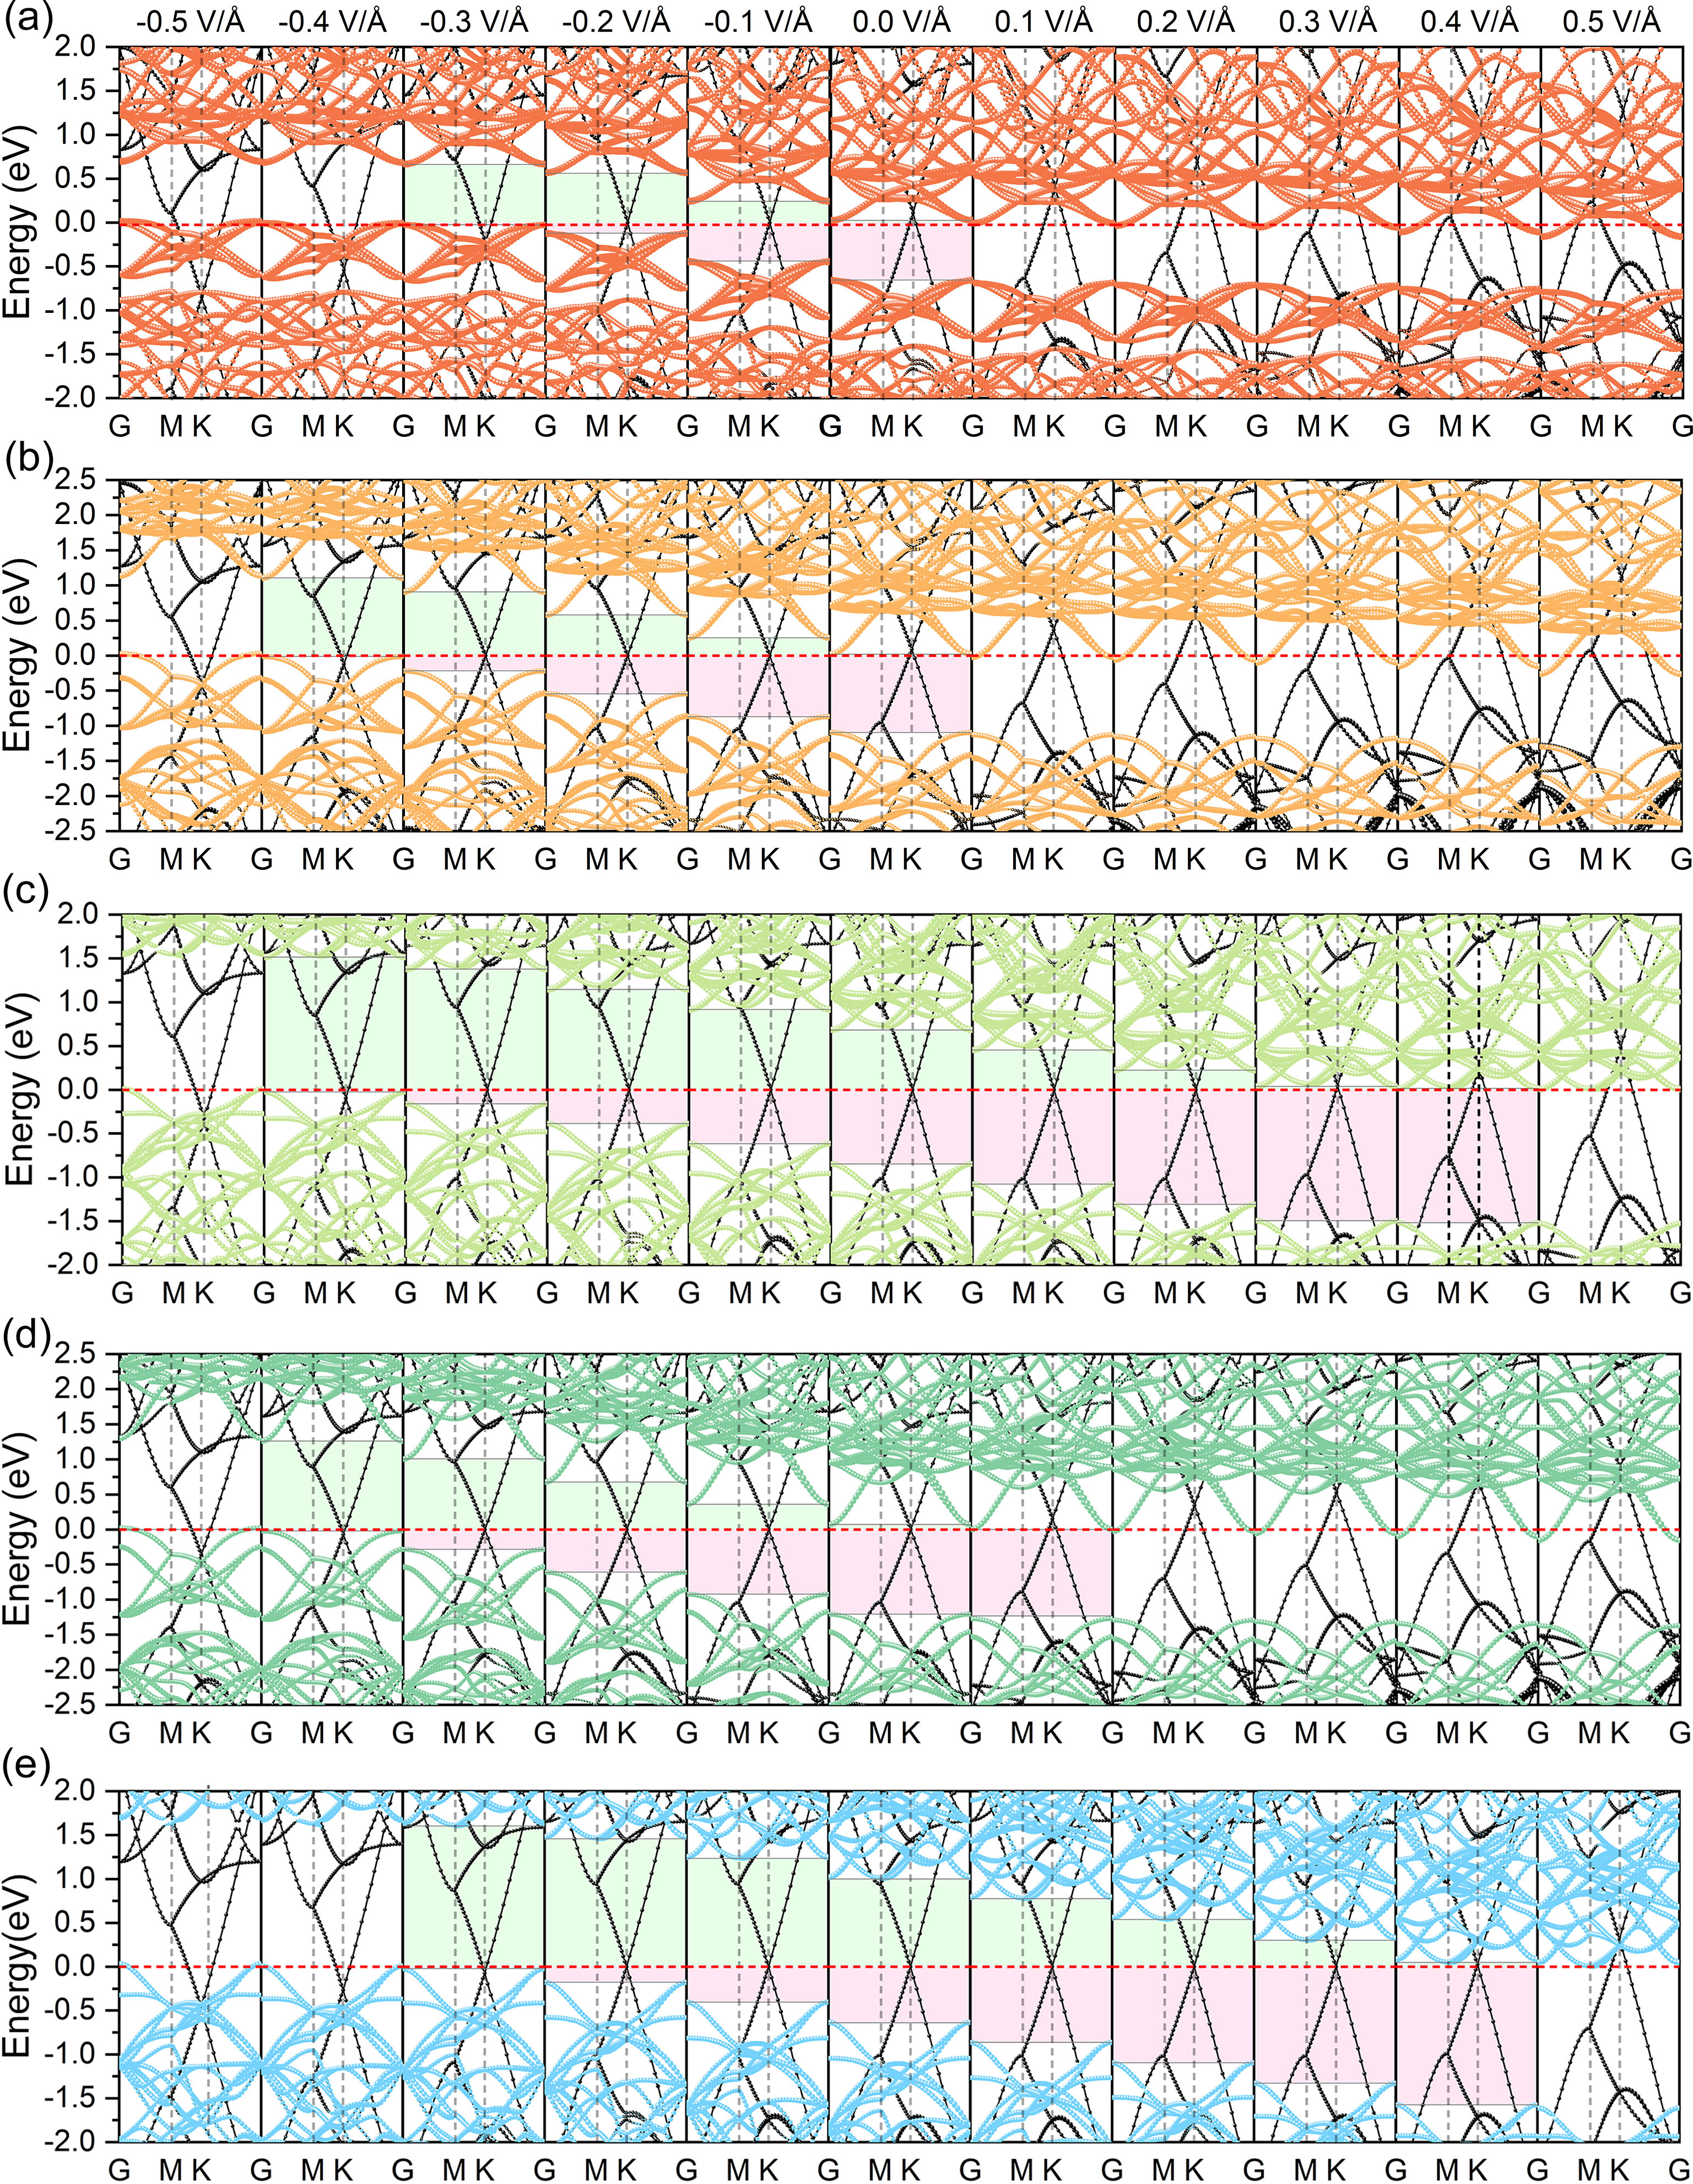


**Figure S2** Projected band structures of C-MX2[(a) C-CrSe2, (b) C-MoS2, (c) C-MoSe2, (d) WS2 (e) WSe2] under external electric fields ranging from -0.5 to 0.5 V/Å with an interval of 0.1 V/Å.


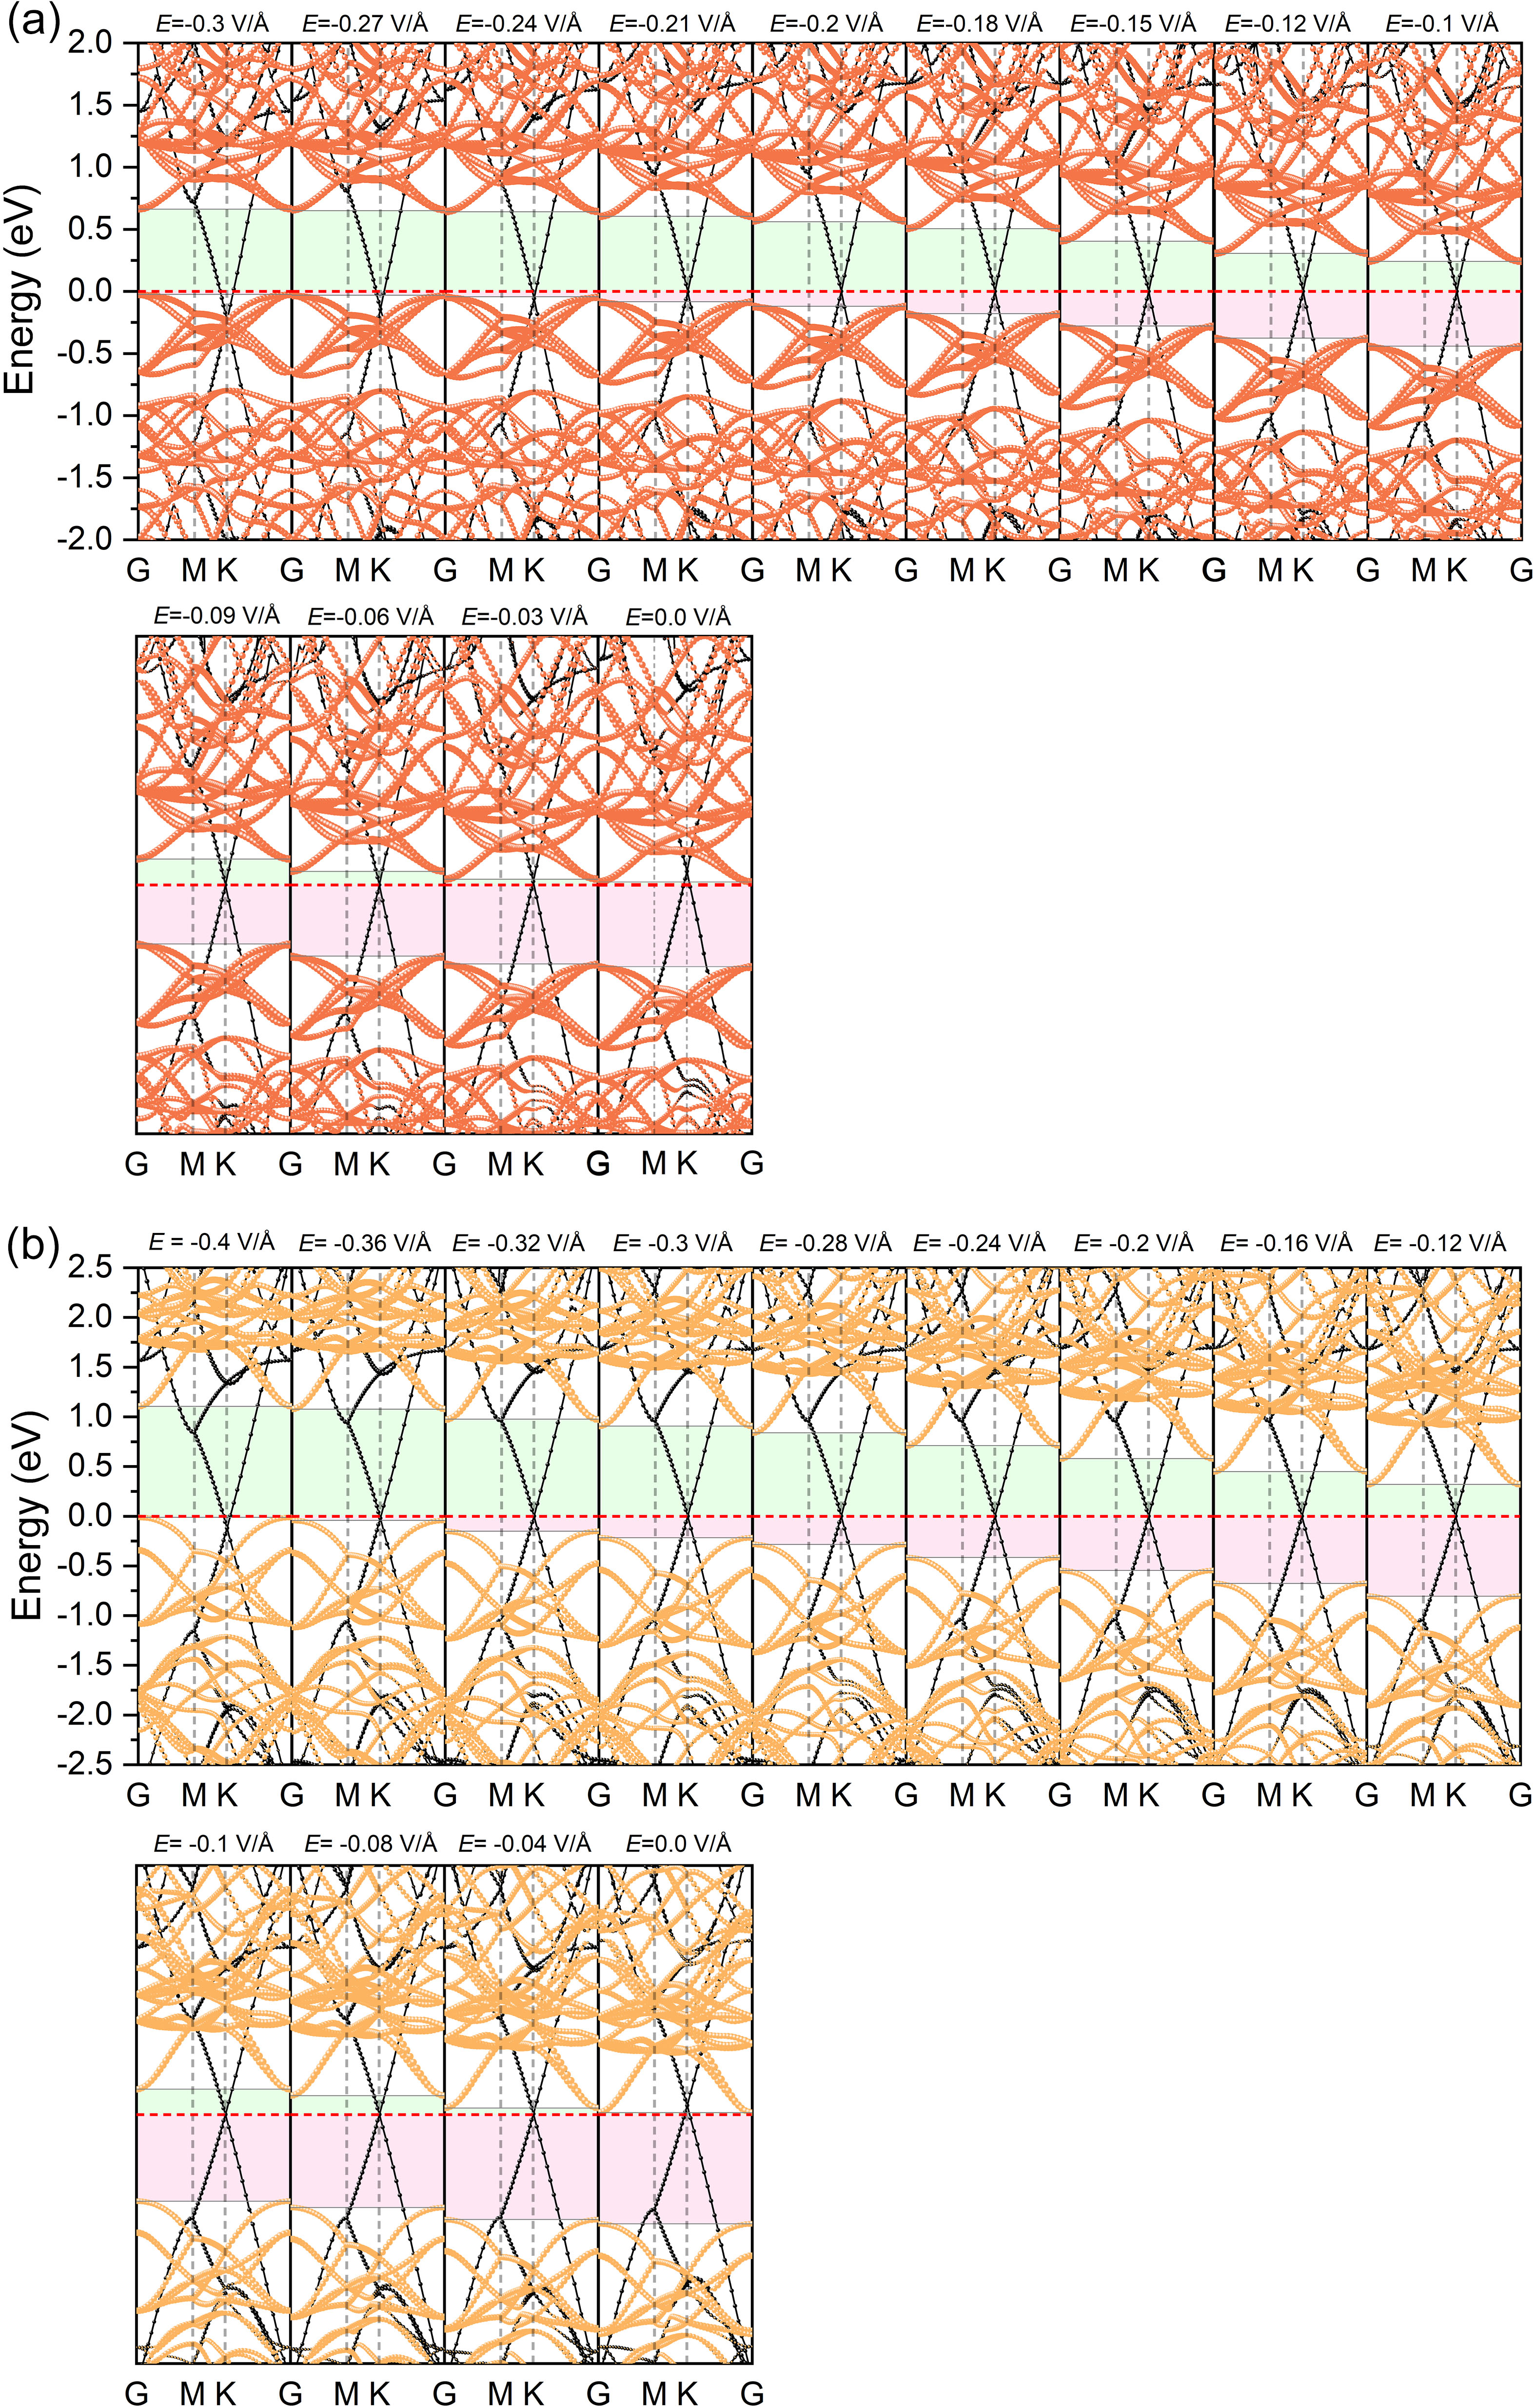

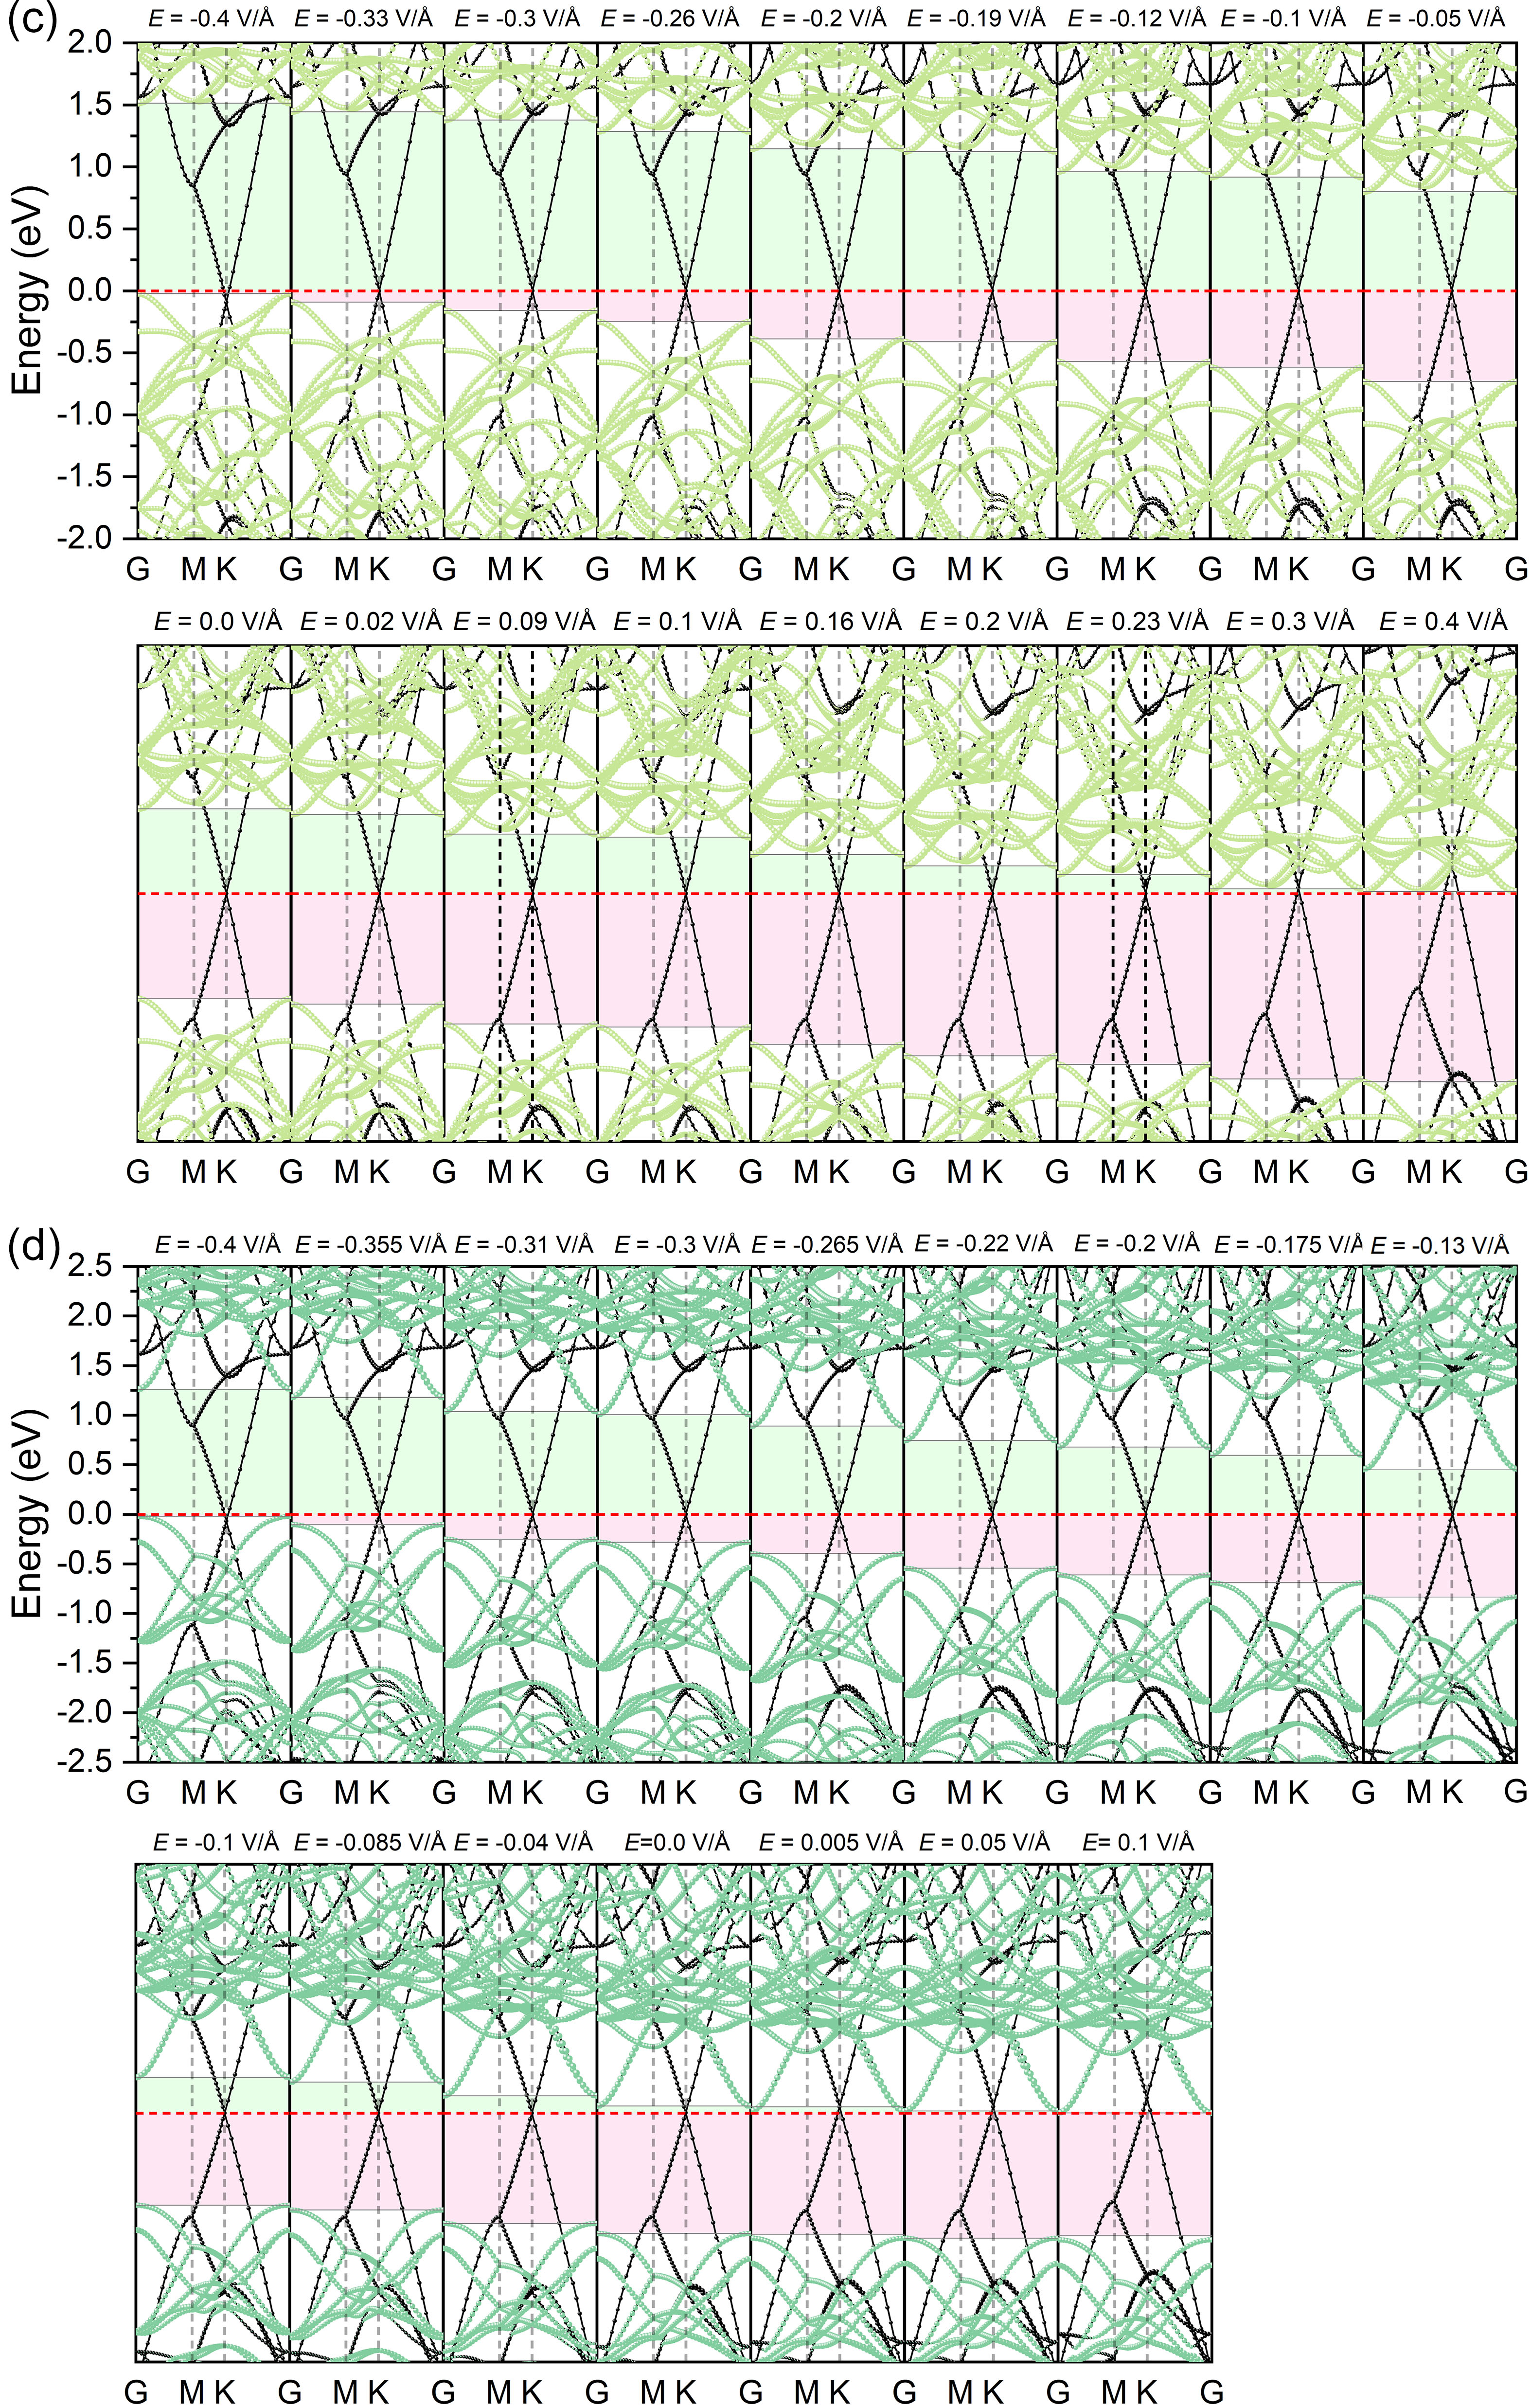

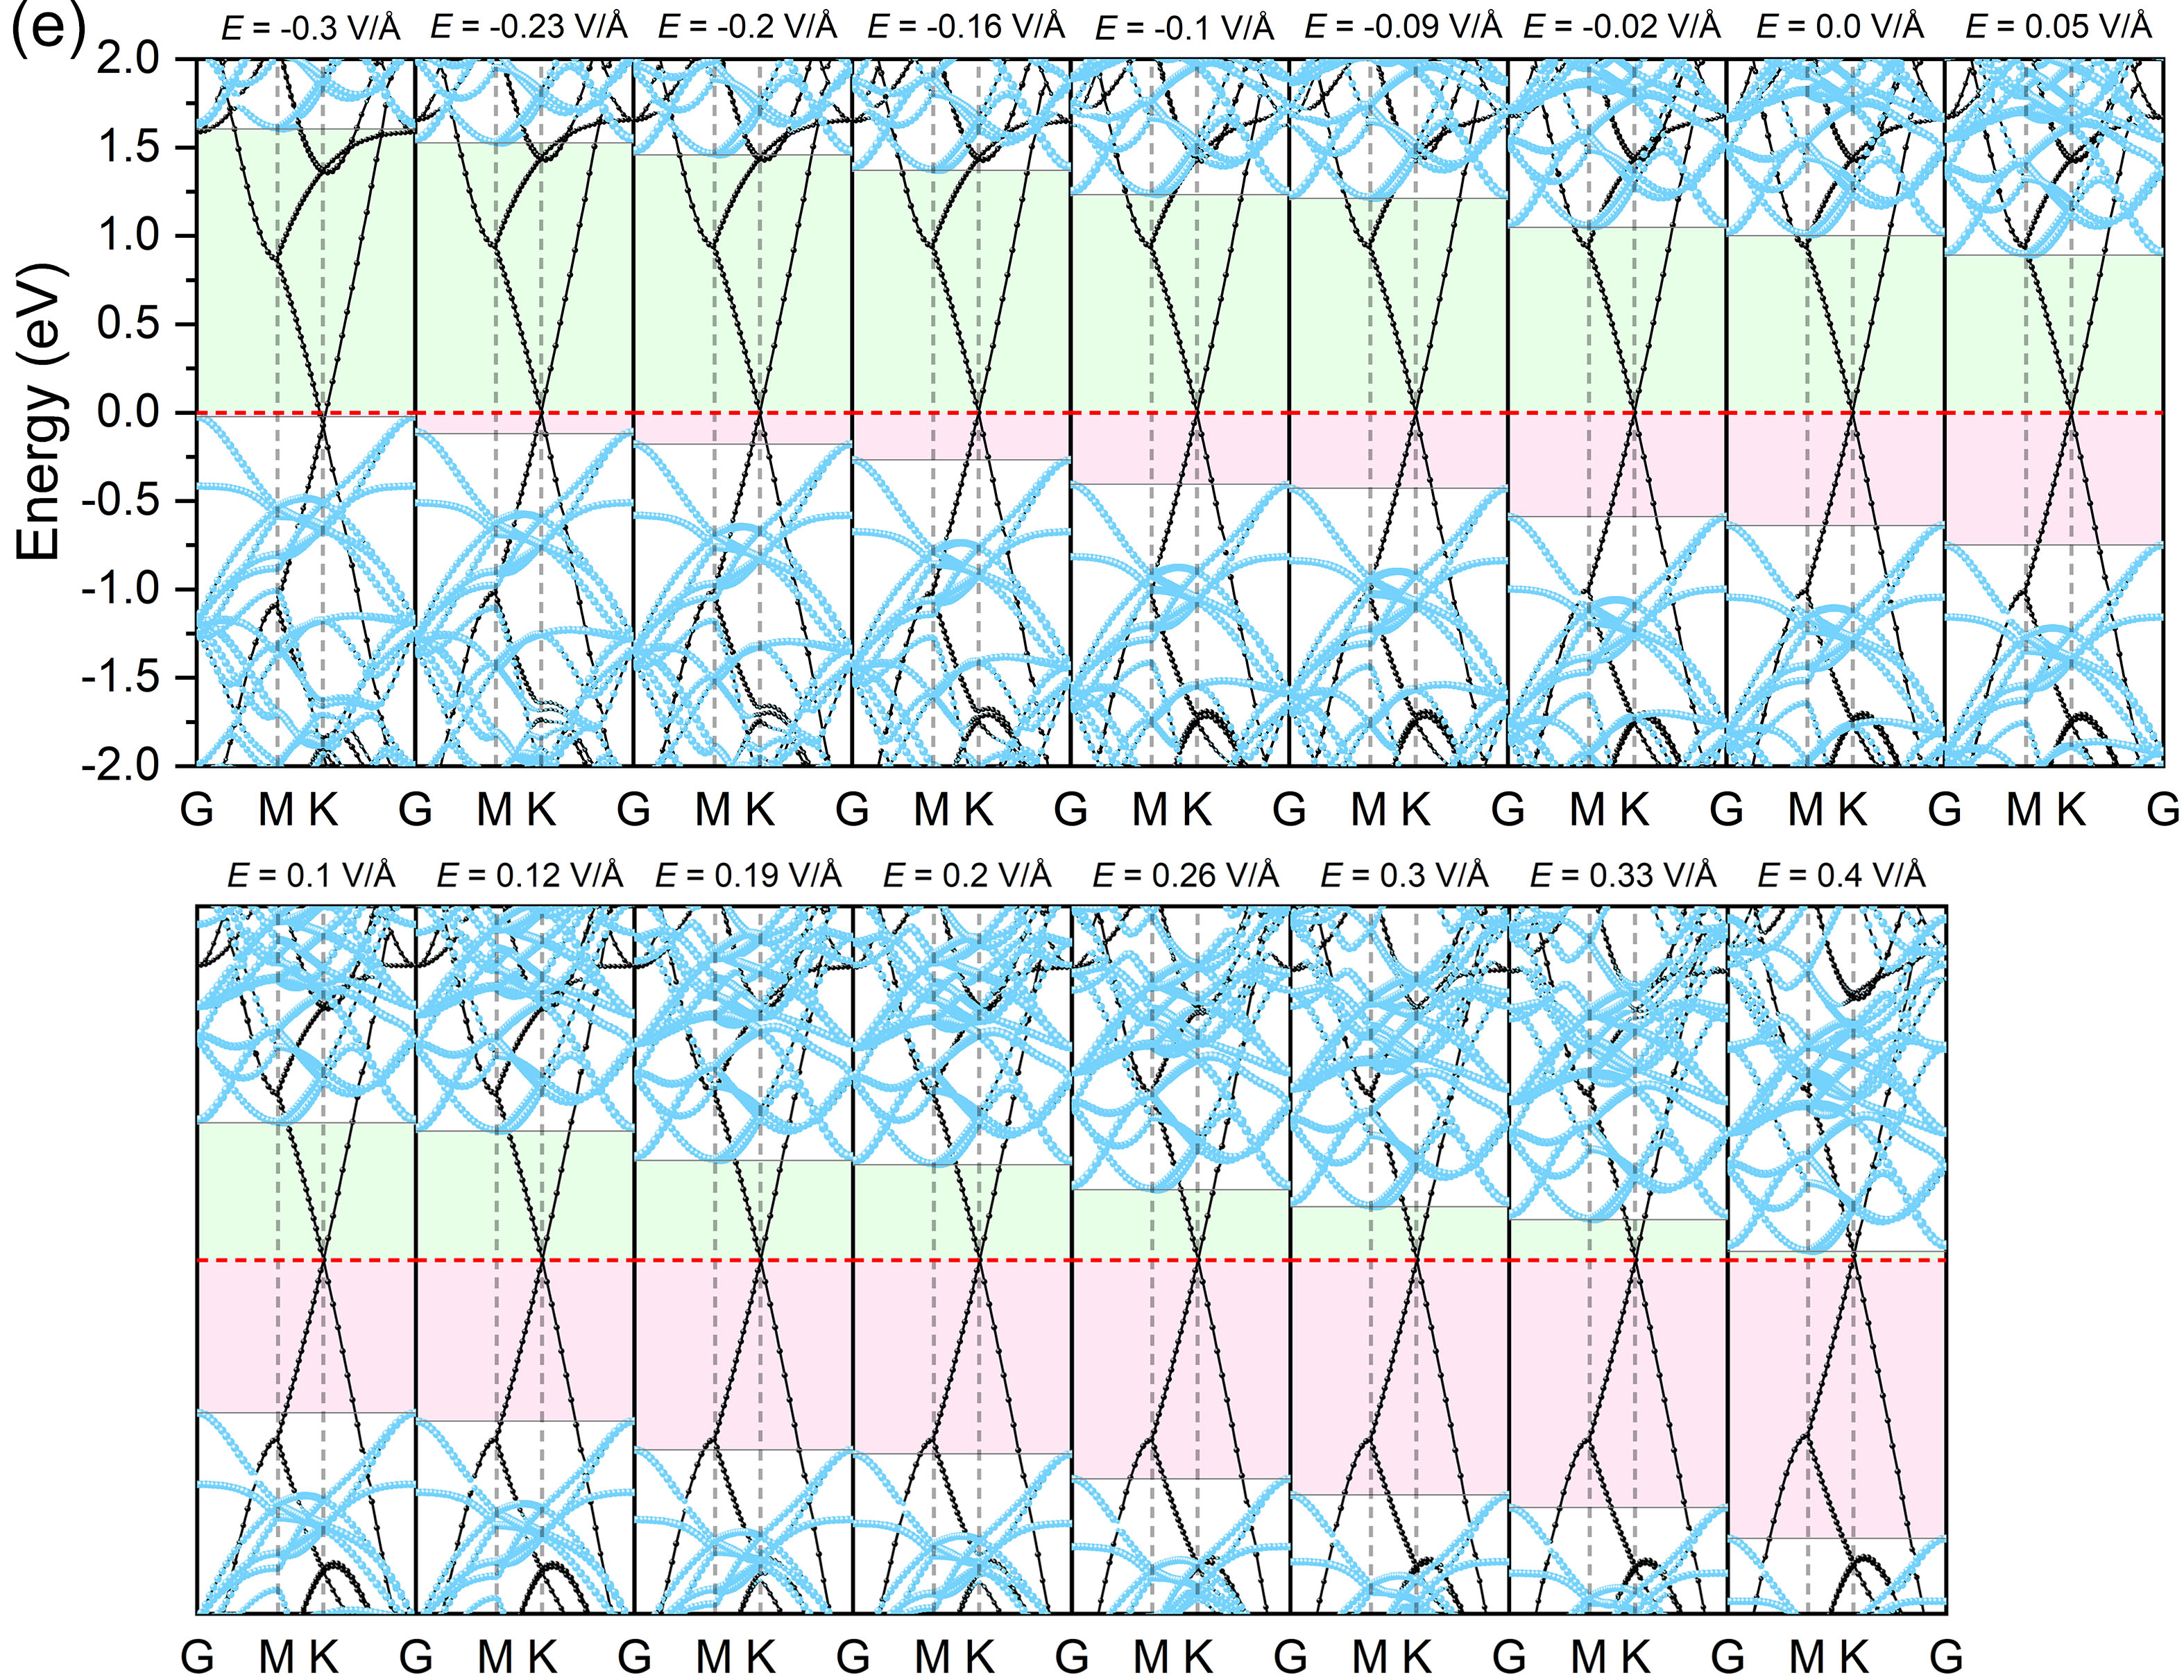


**Figure S3** Projected band structures of five heterostructures [(a) C-CrSe2, (b) C-MoS₂, (c) C-MoSe₂, (d) C-WS₂, (e) C-WSe₂] with reduced electric field interval spacing.


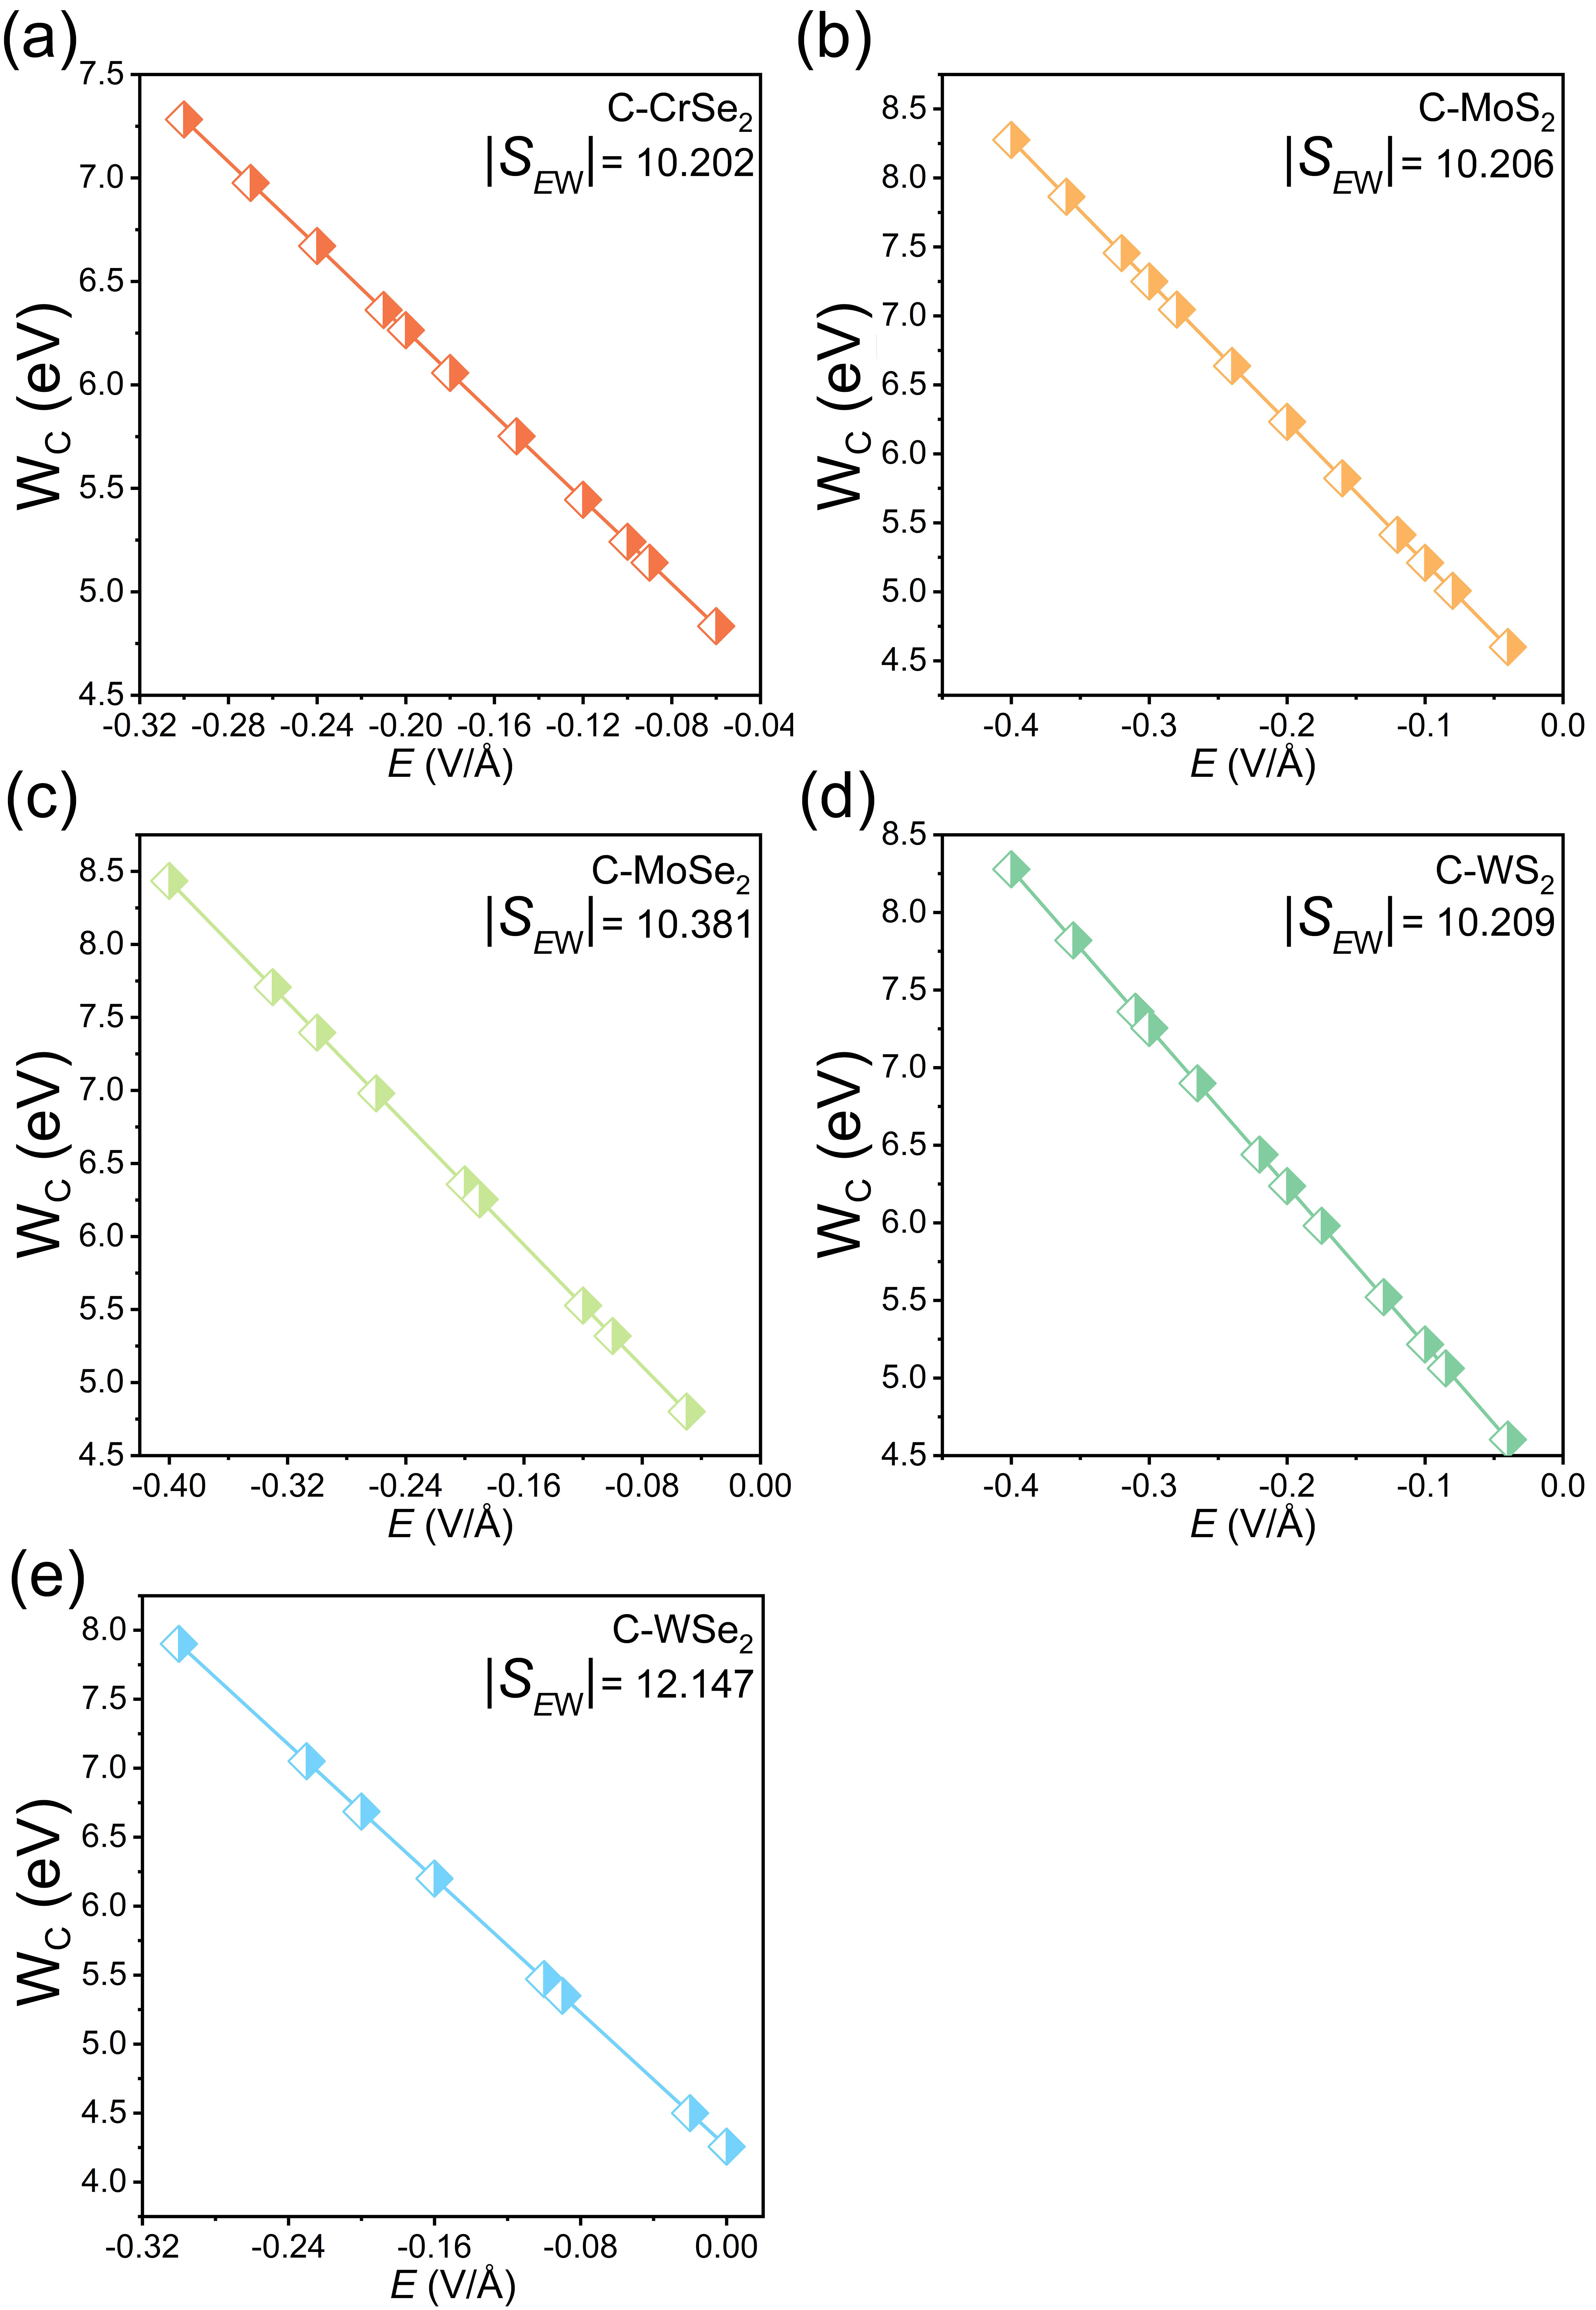


**Figure S4** The functional relationship between the WC and the applied electric field in each C-MX2 heterostructure.


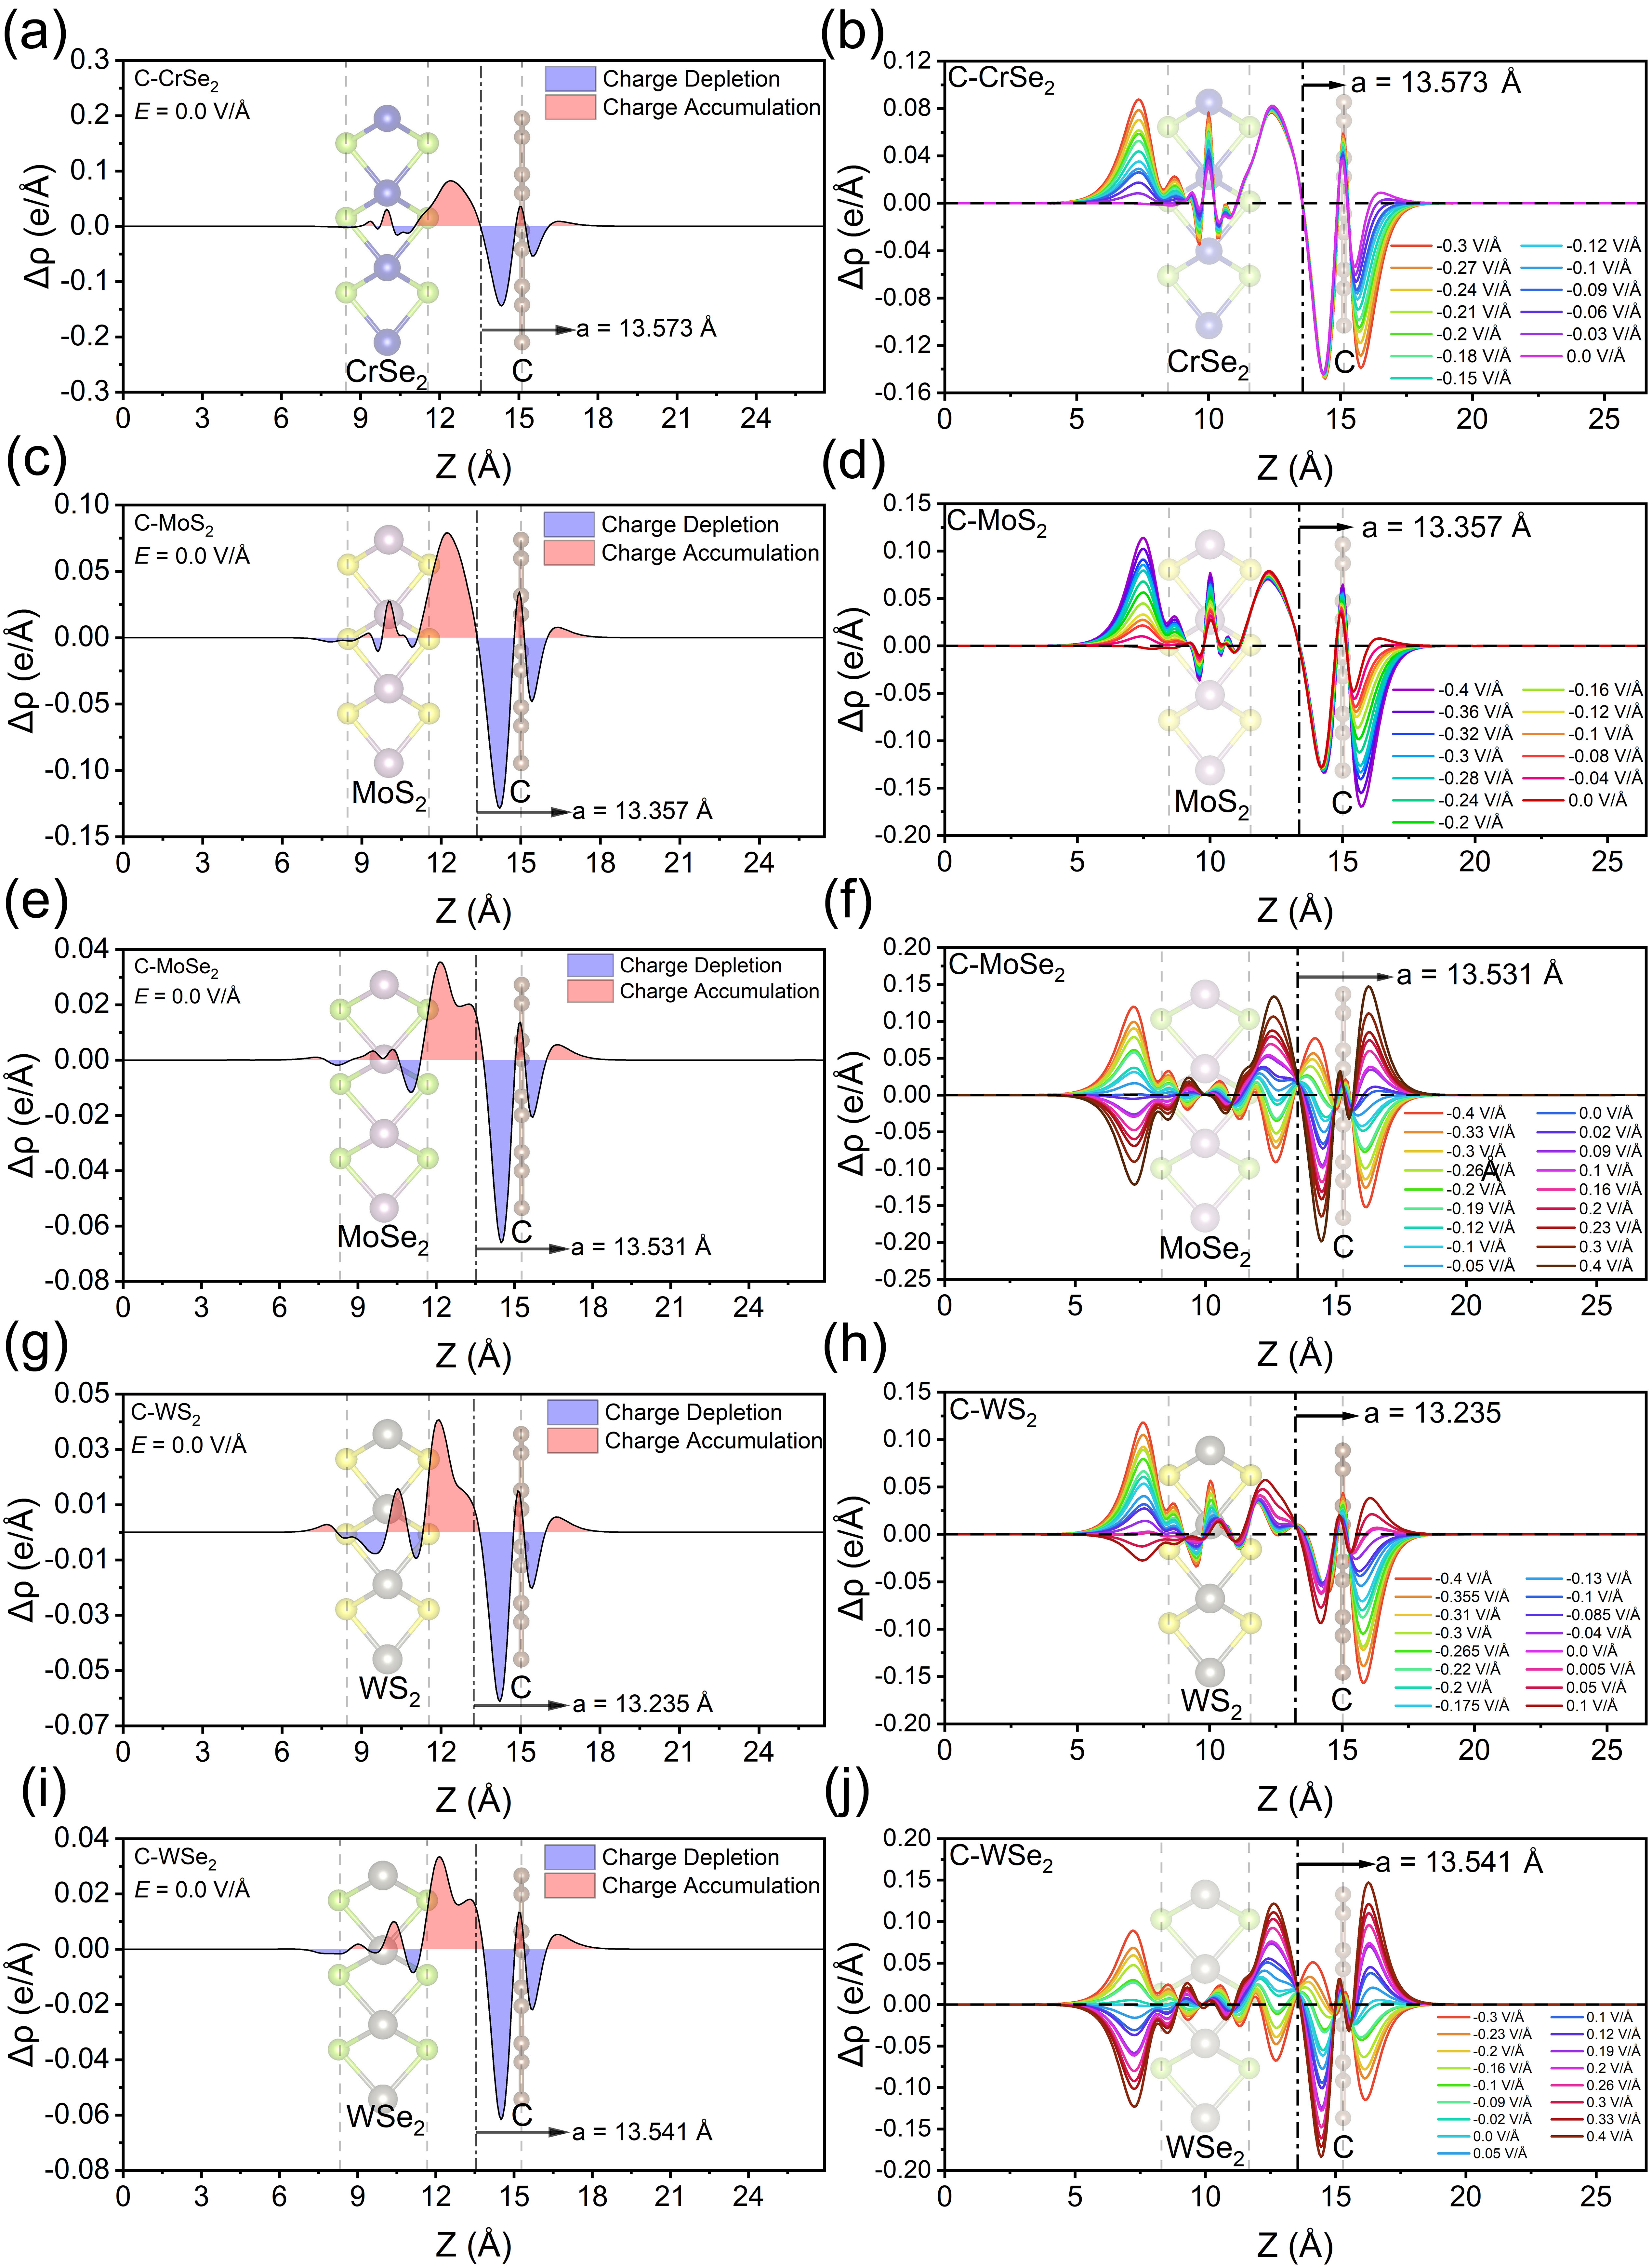


**Figure S5** Plane averaged charge density differences of each heterostructure at *E* = 0 V/Å and under various electric fields.


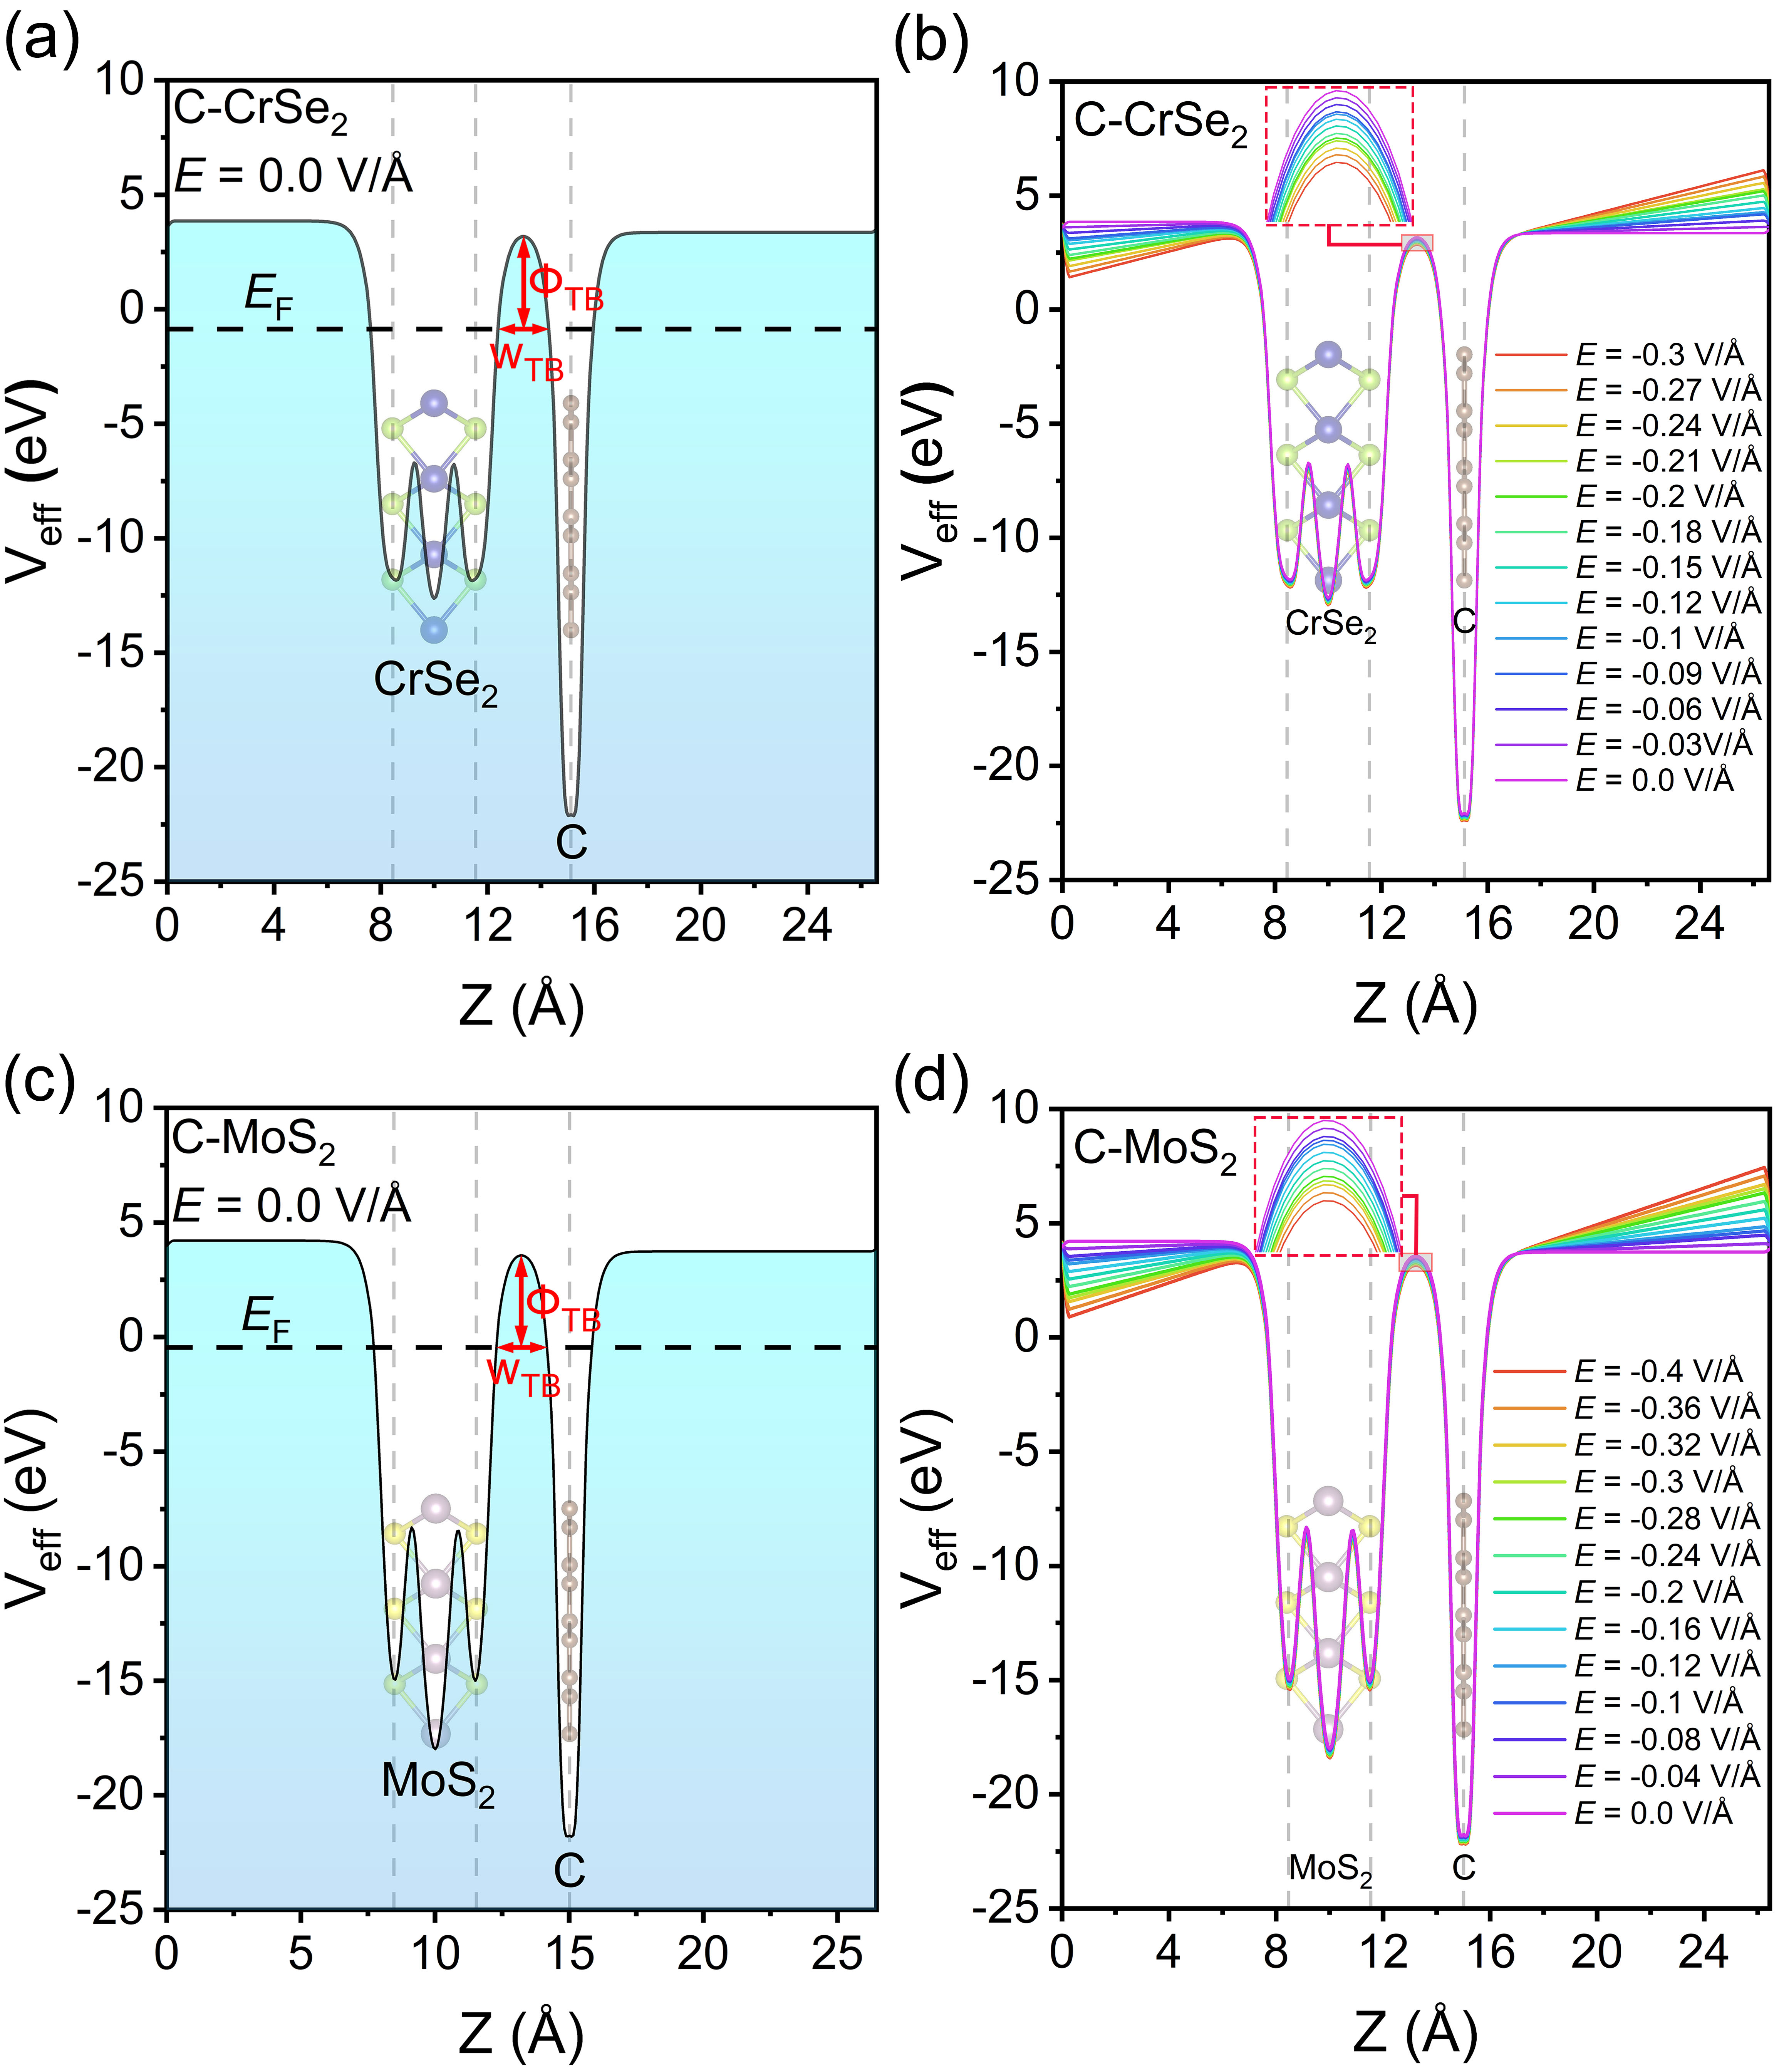


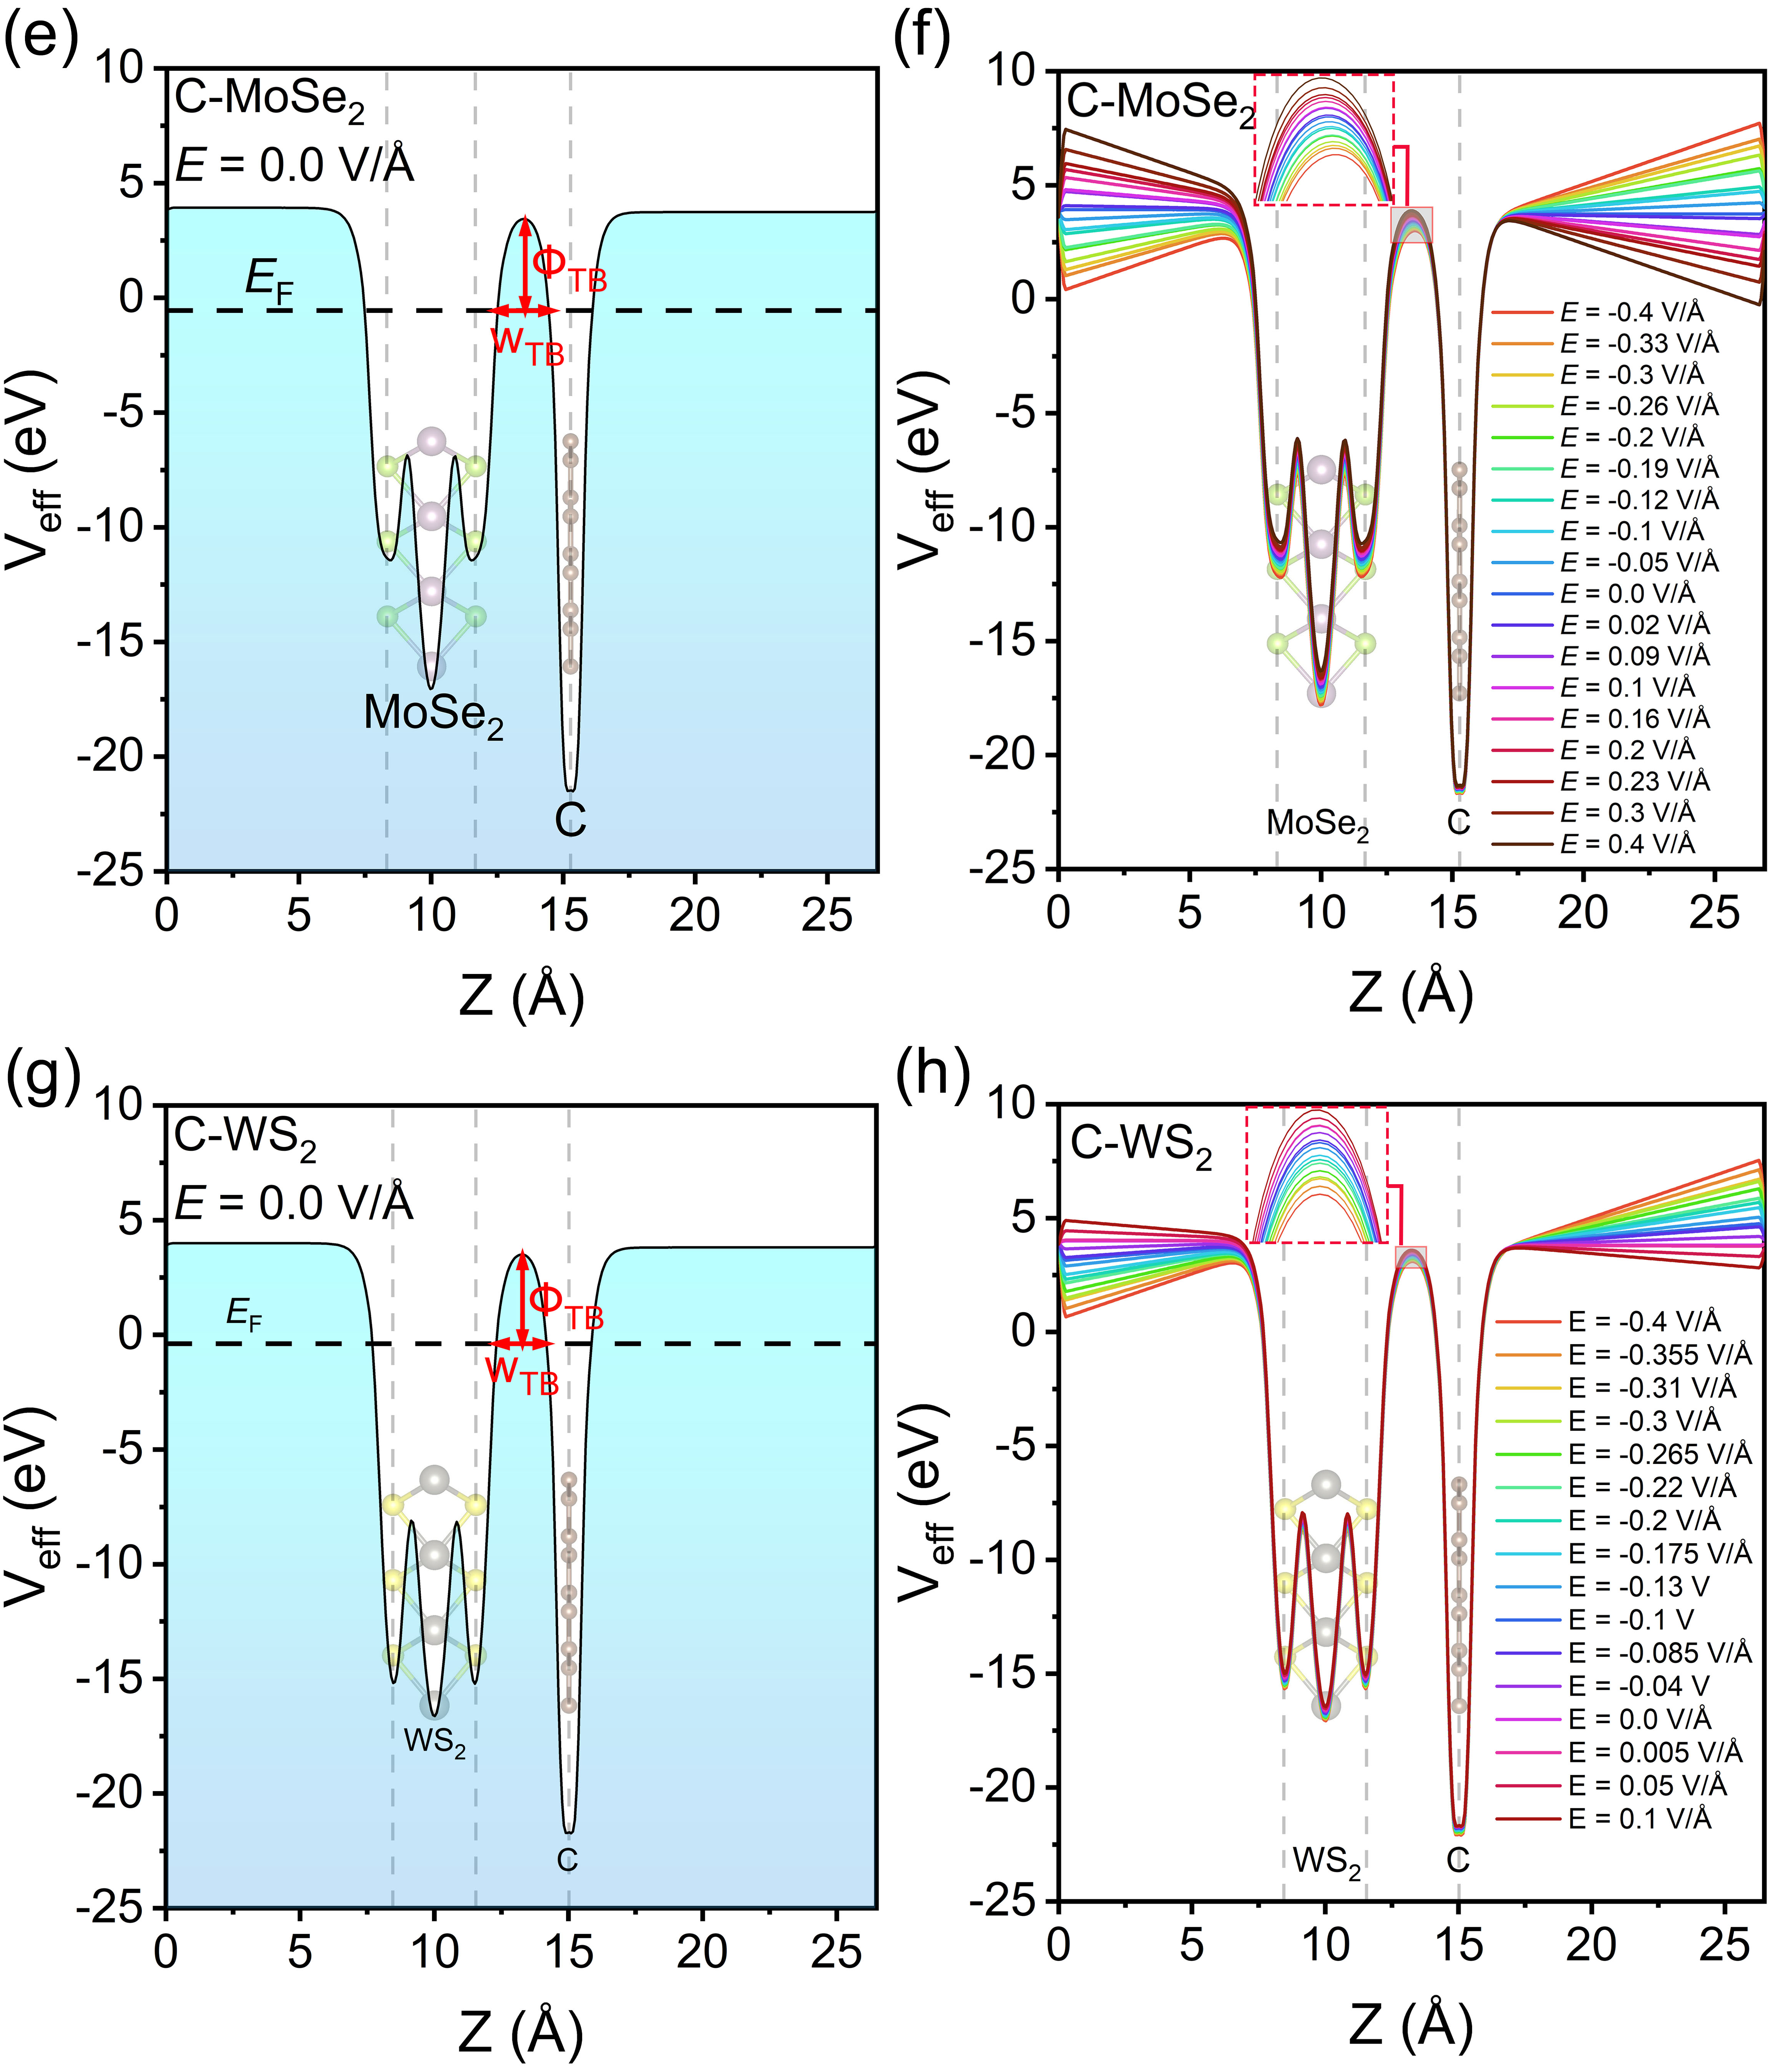


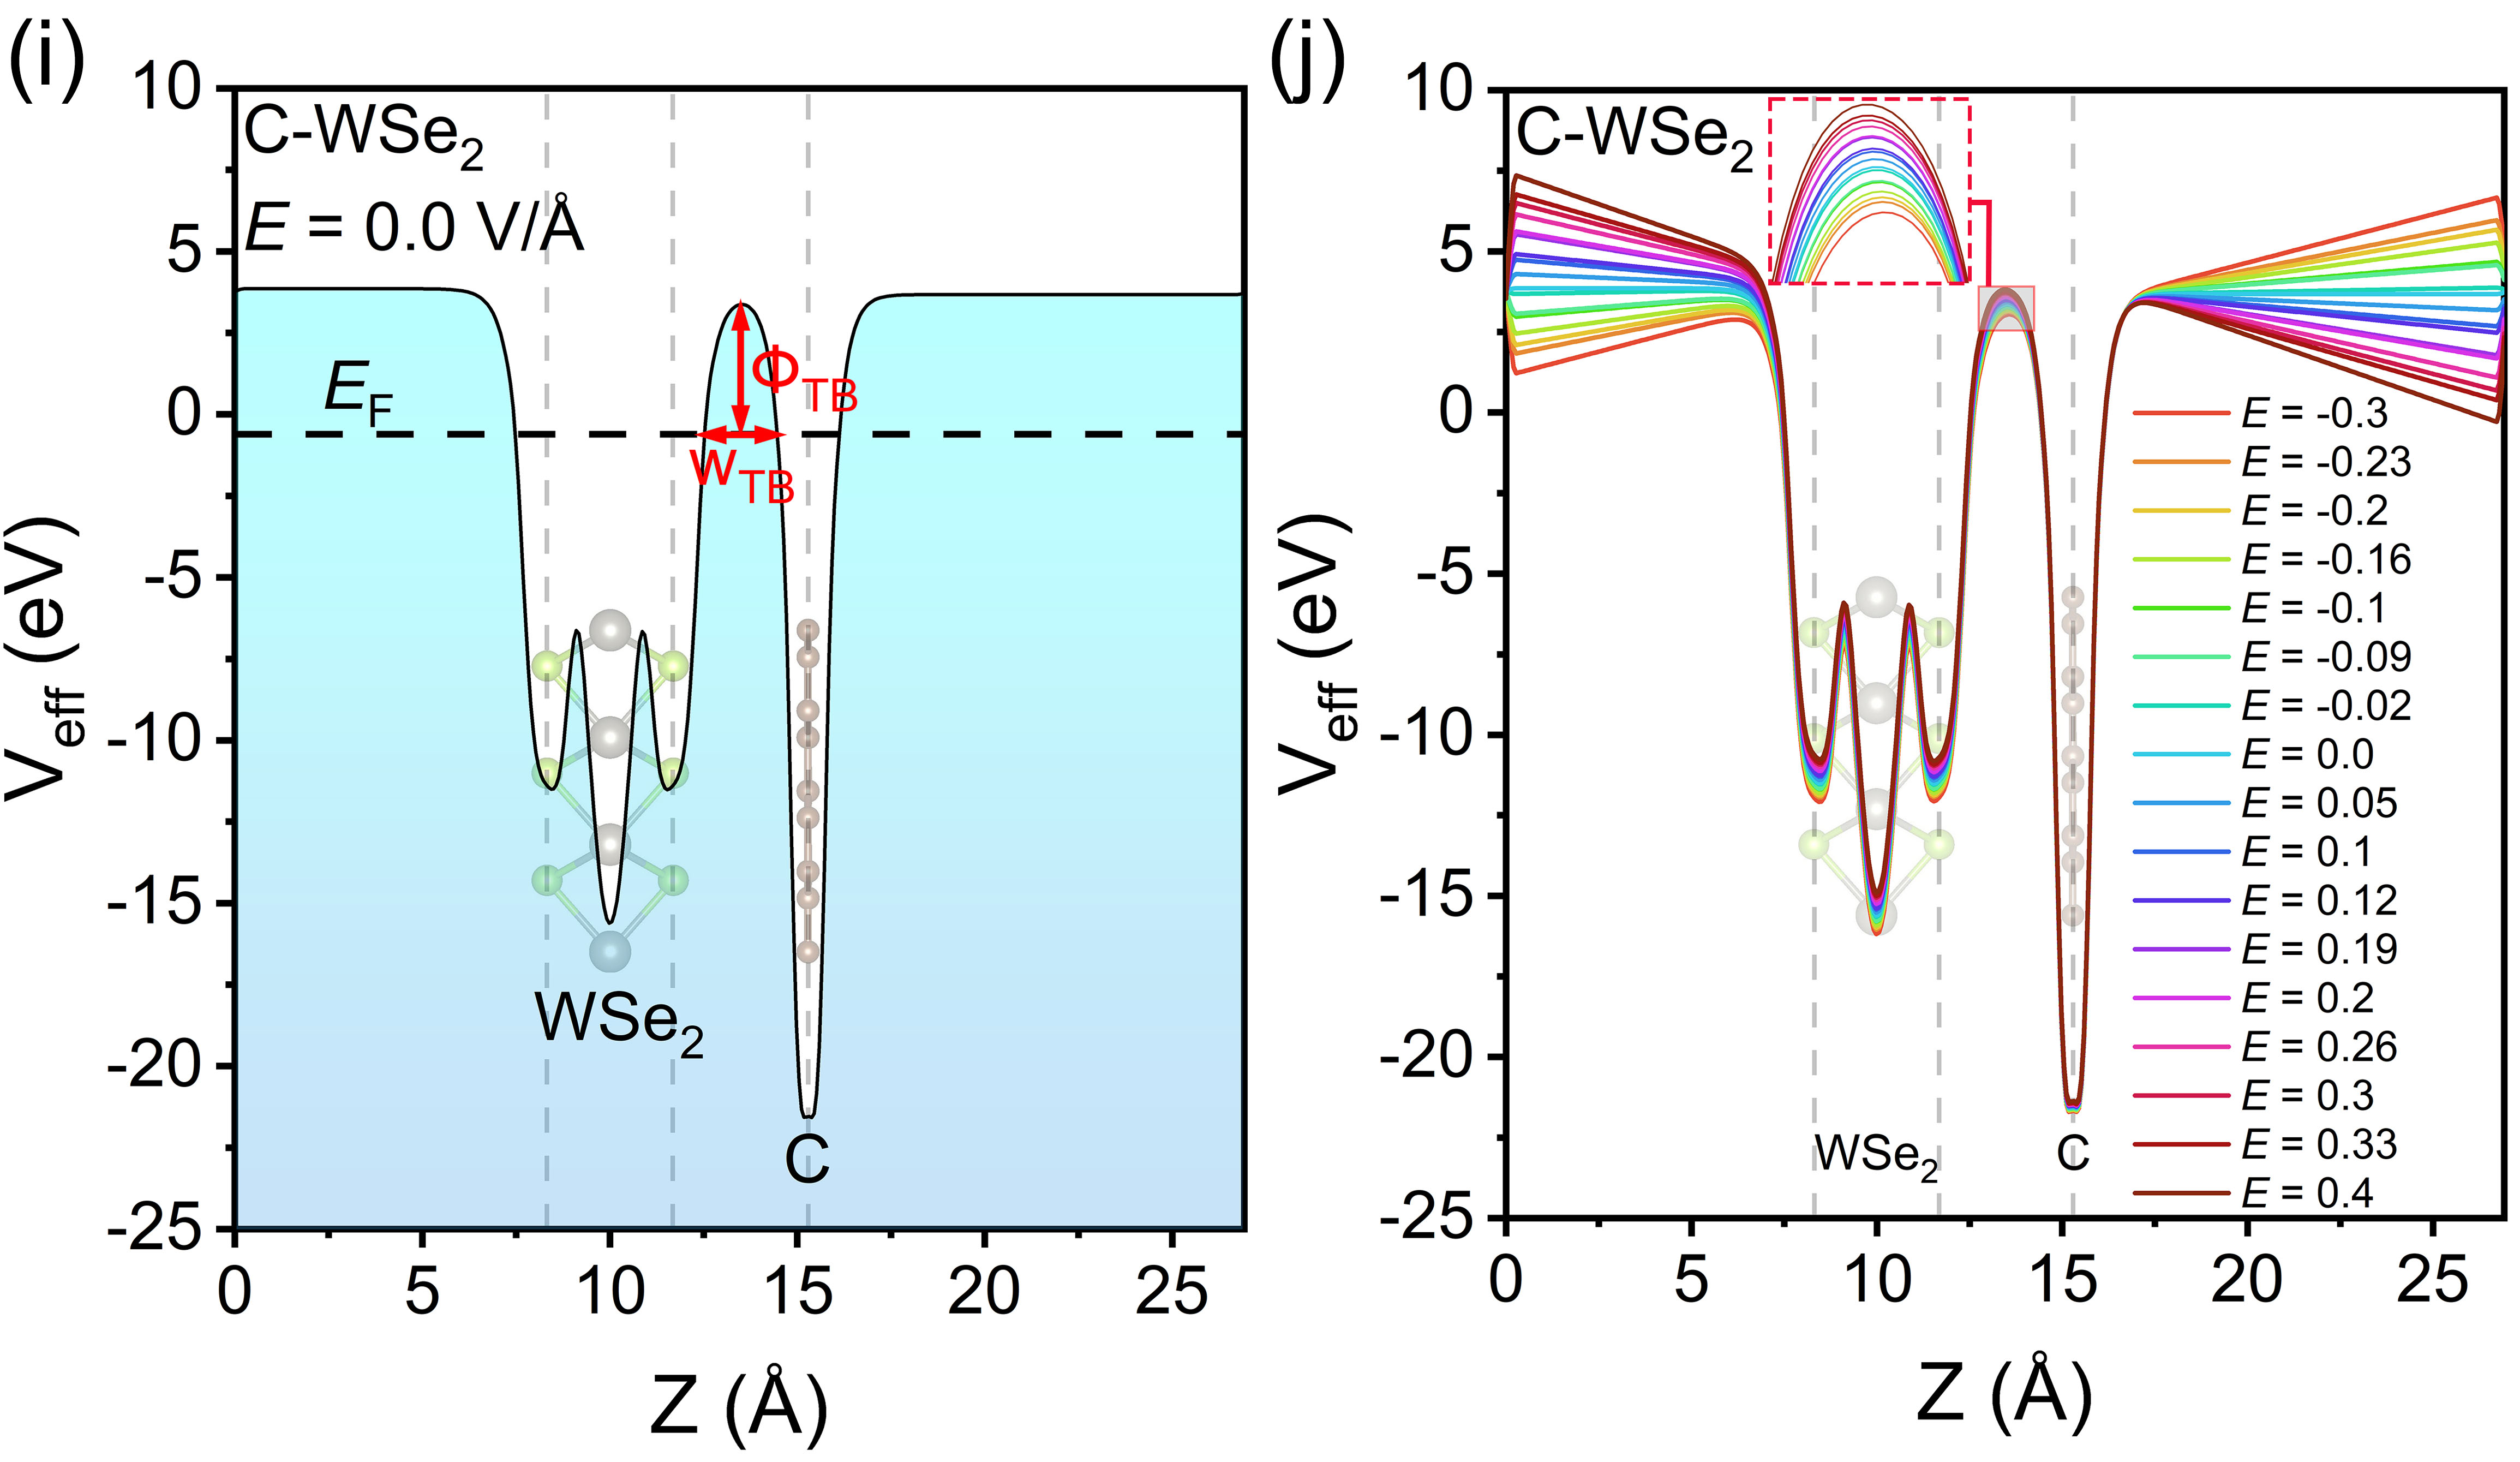


**Figure S6** Effective electrostatic potential of each heterostructure at *E* = 0 V/Å and under various electric fields.


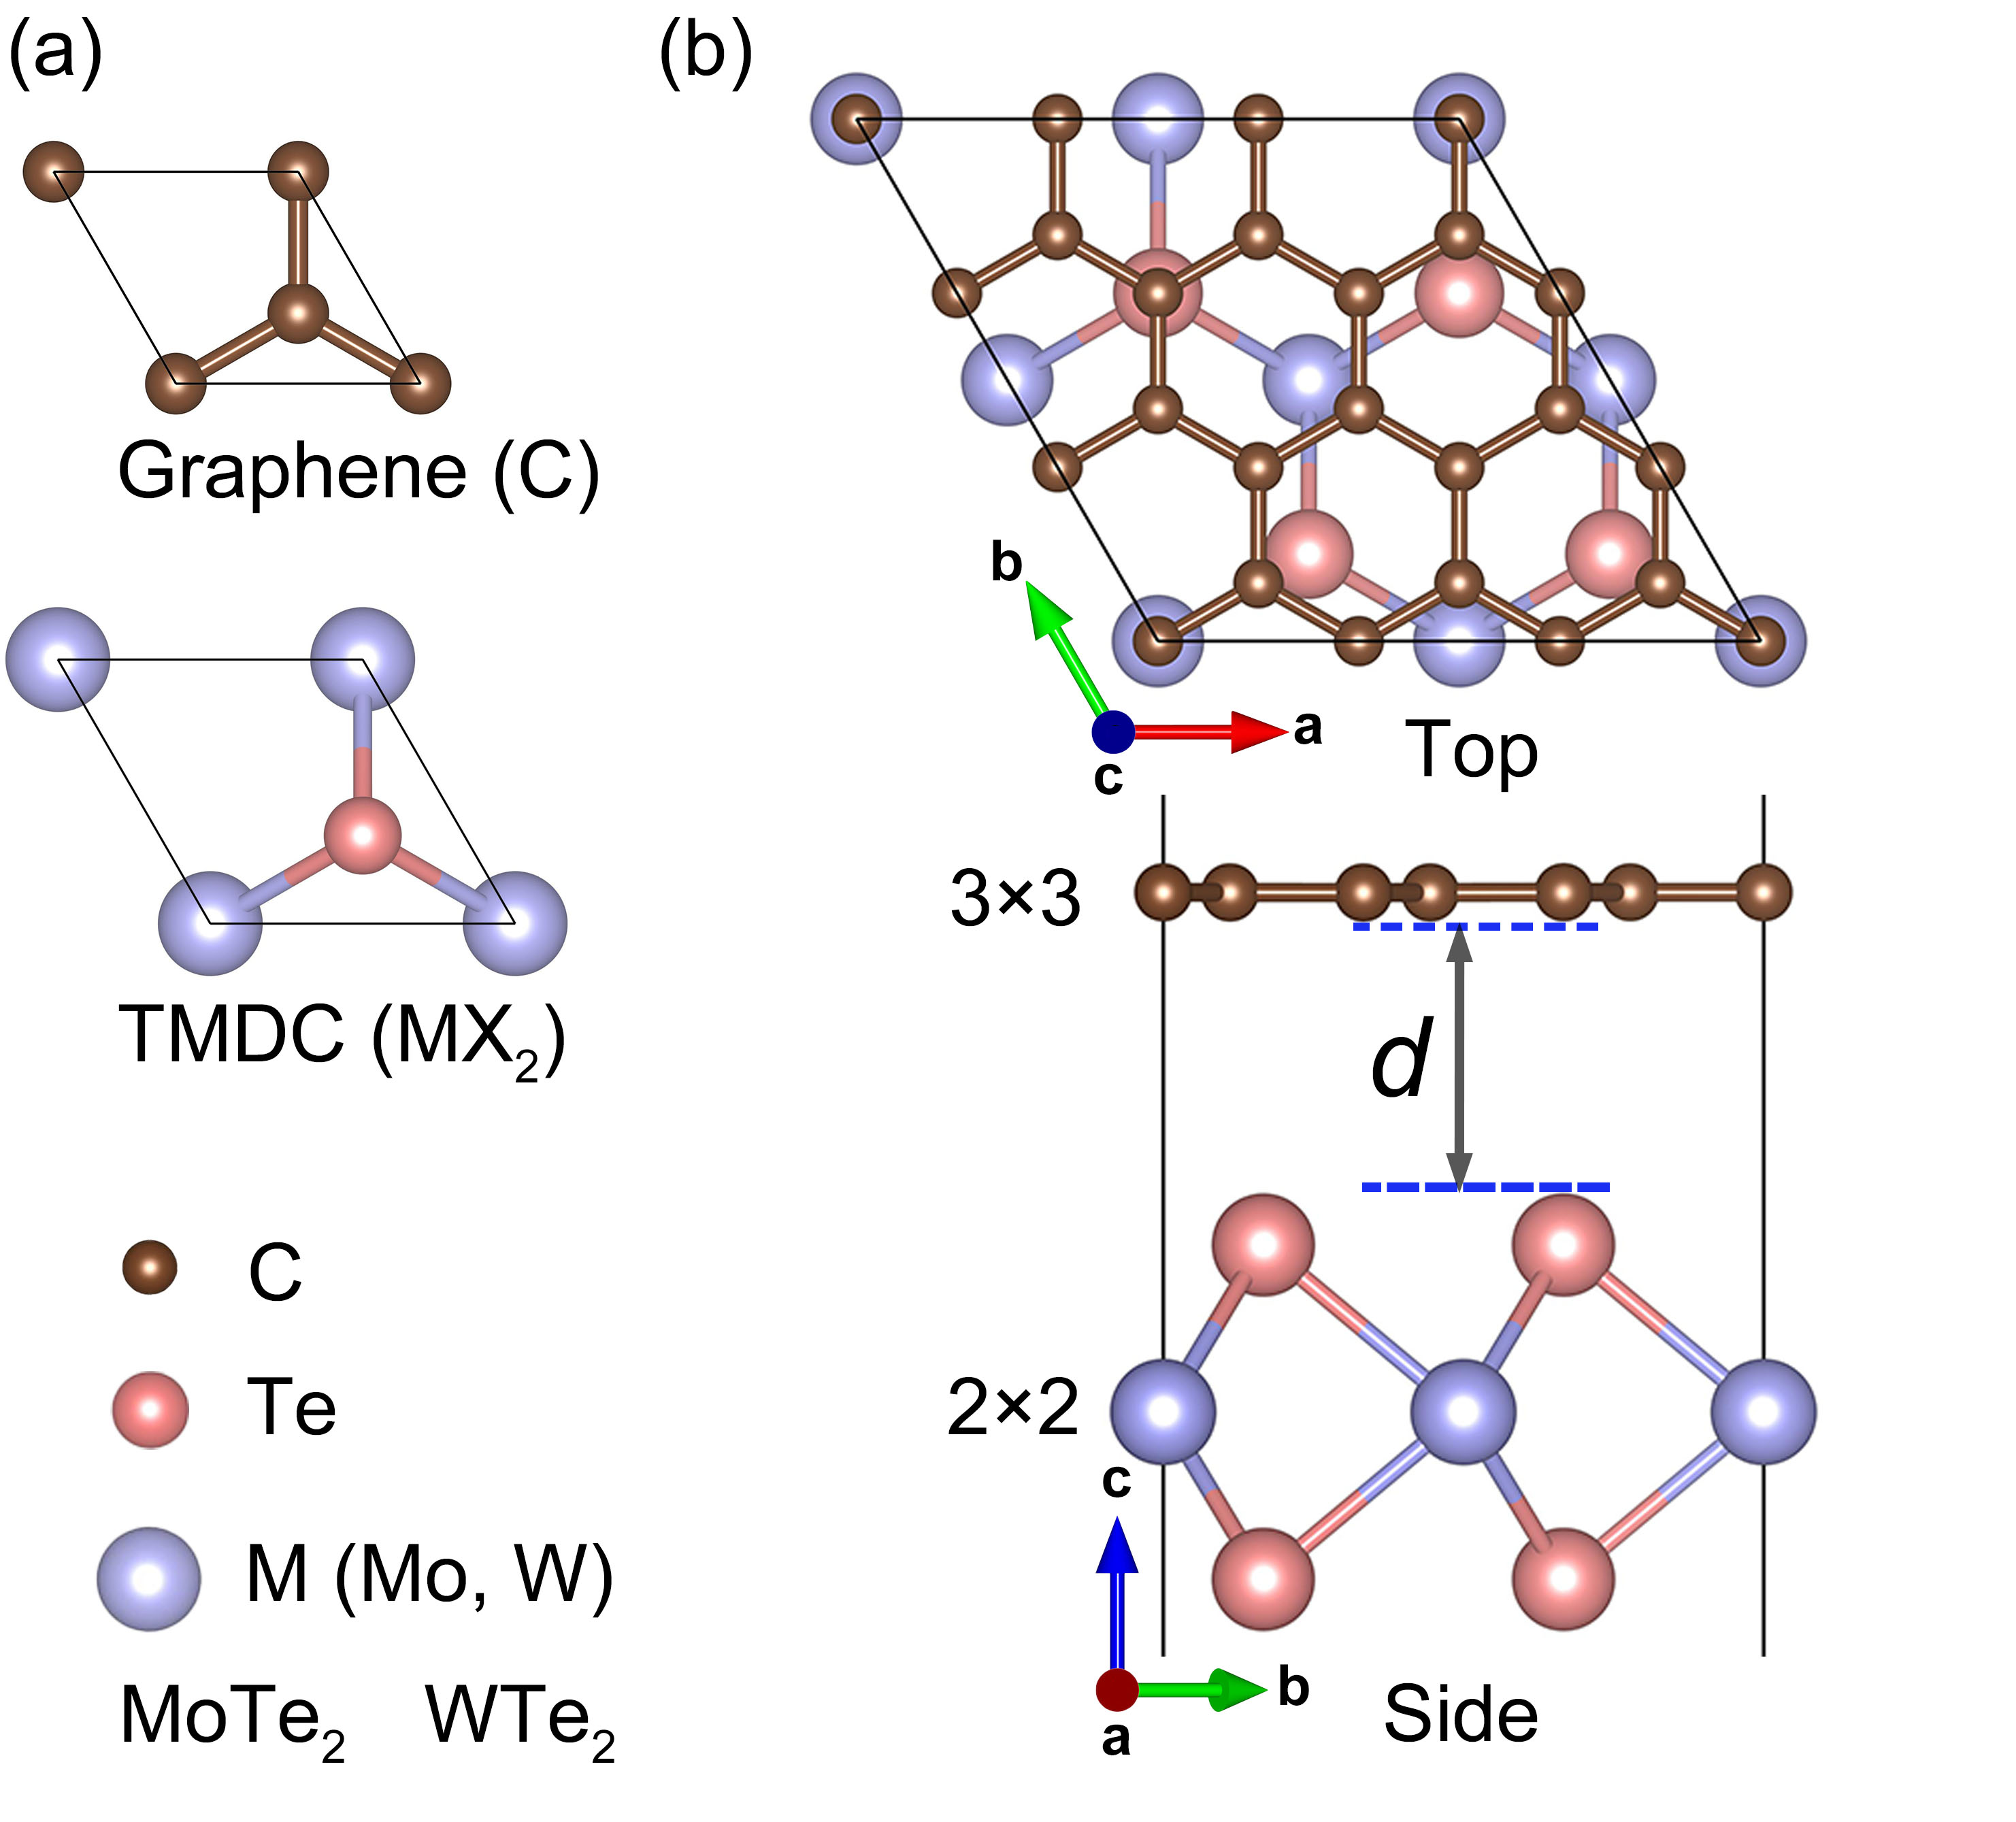


**Figure S7** (a) Unit cell structures of graphene and MX2 (MoTe2 or WTe2). (b) Top and side views of C-MX2.
